# Supplementary material
Source: PubMed Central journal article supplement (PMC7010560)

# Colocalization of later-onset asthma and WHRadjBMI cross-trait meta-analysis loci and GTEx eQTL

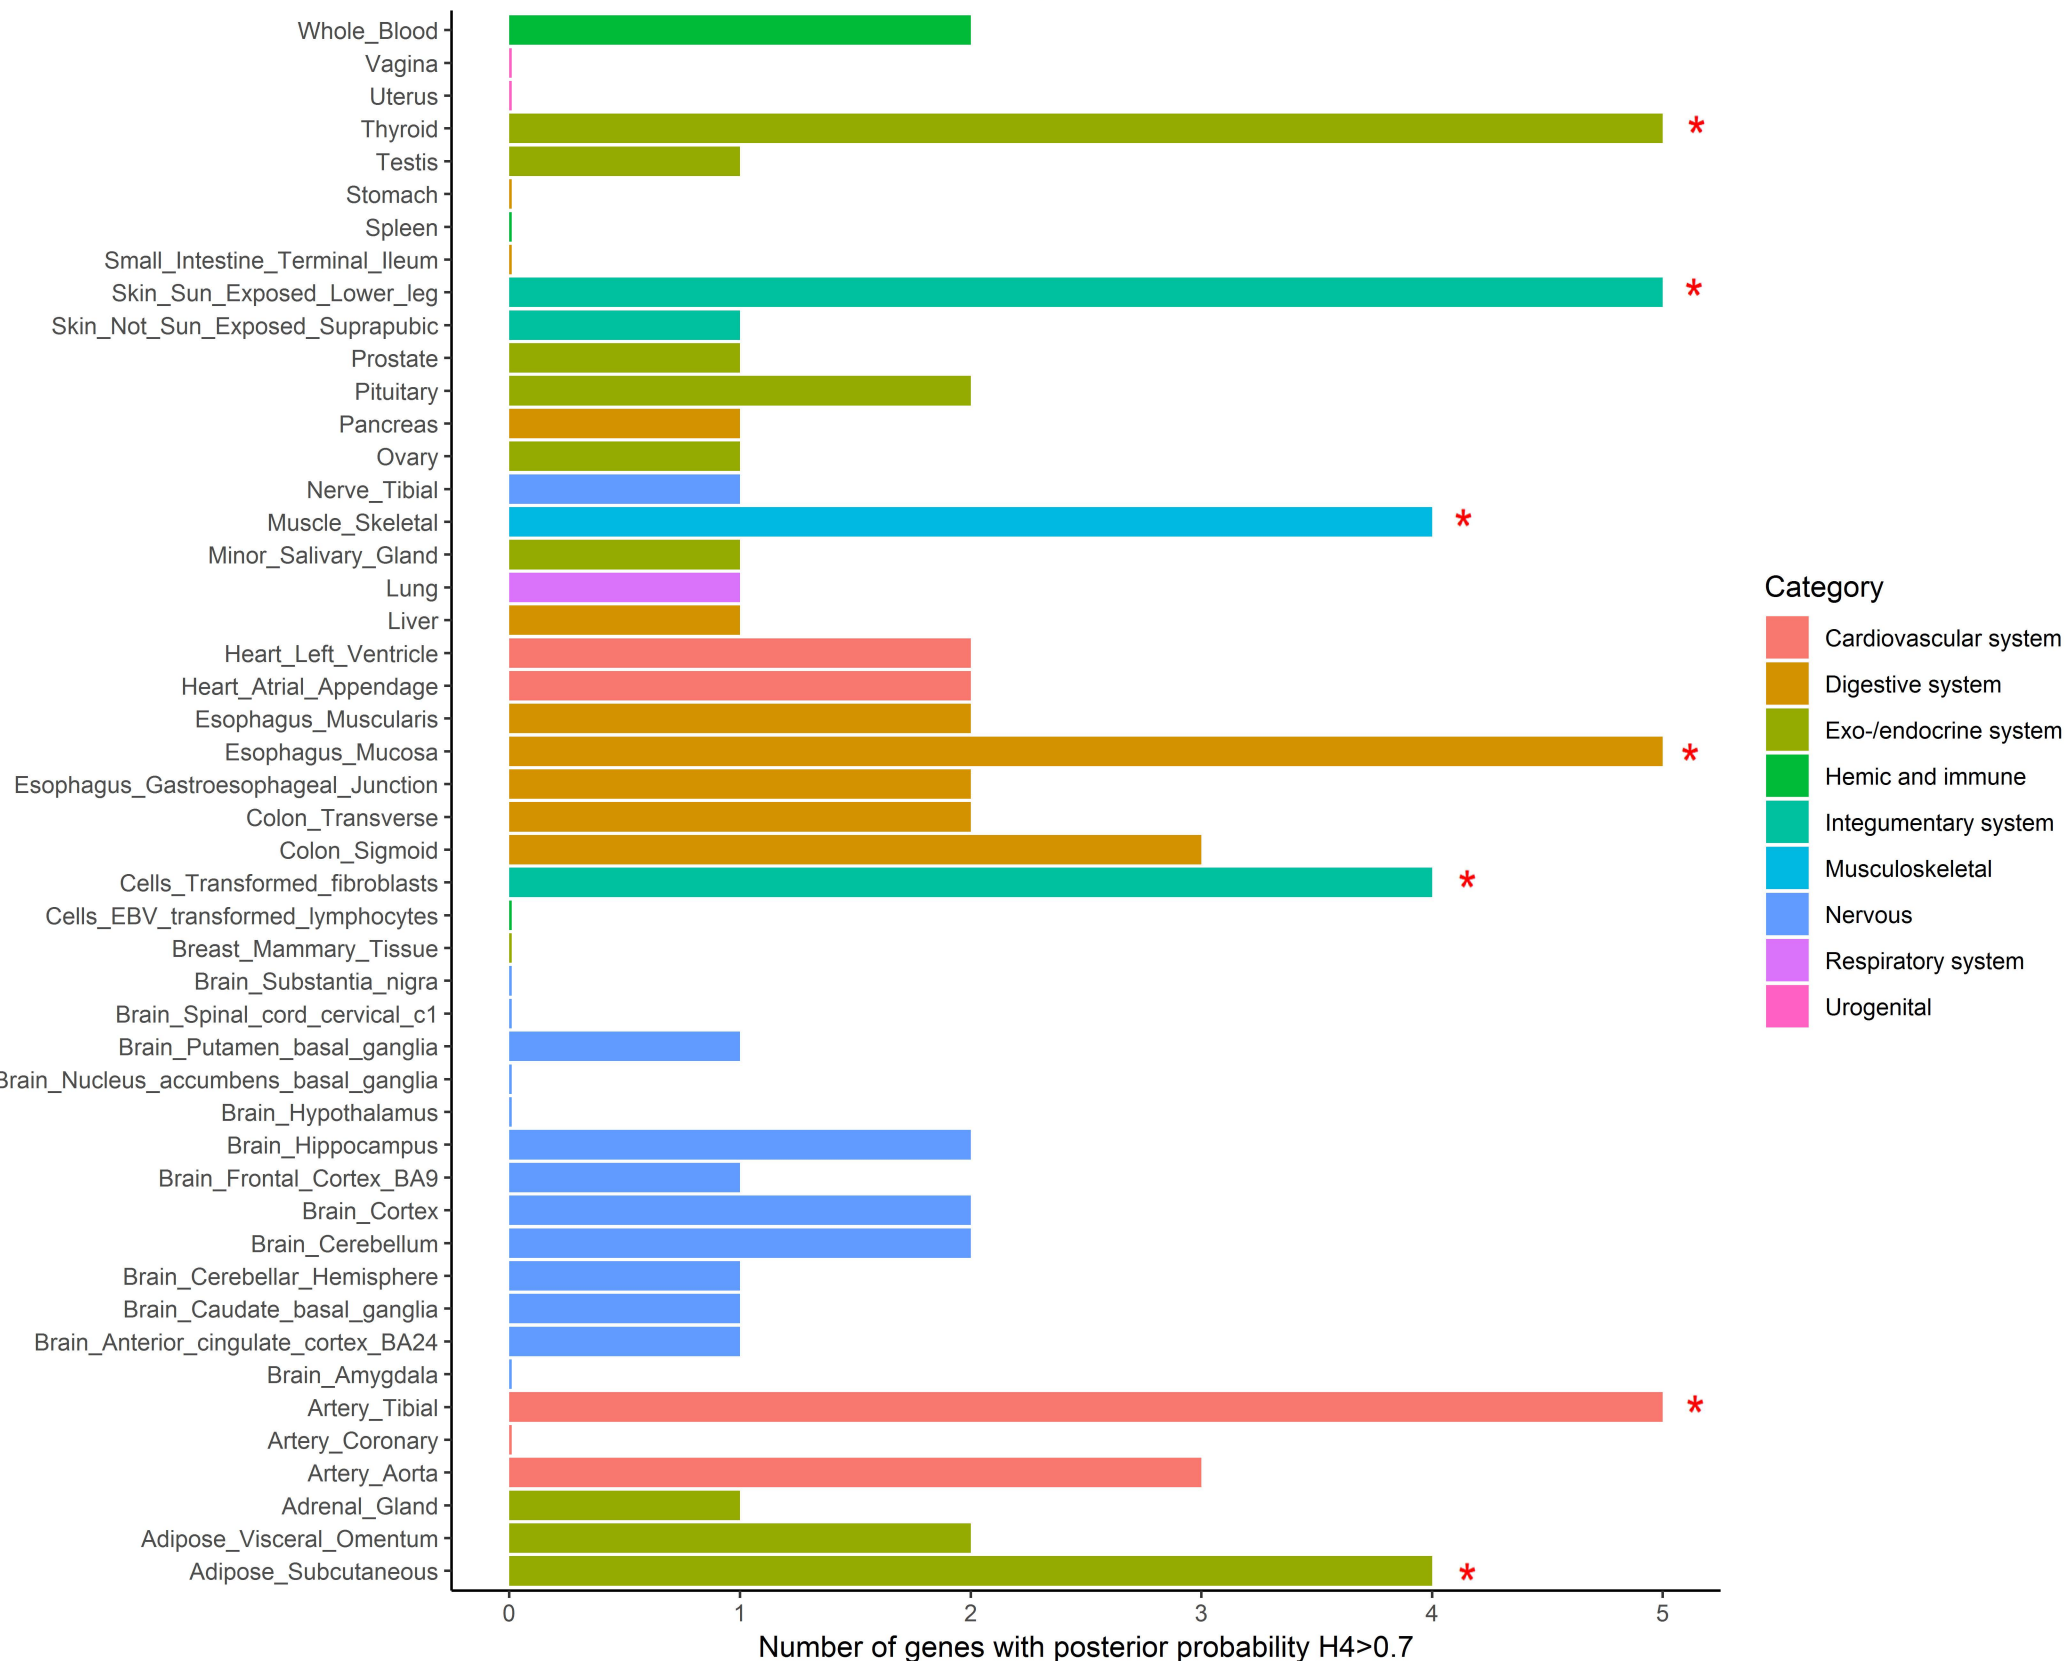

Supplement: NIHMS1545367-supplement-16.pdf [file NIHMS1545367-supplement-16.pdf]
