# Supplementary material
Source: PubMed Central journal article supplement (PMC7010560)

**Figure S1. Manhattan plot of later-onset asthma**

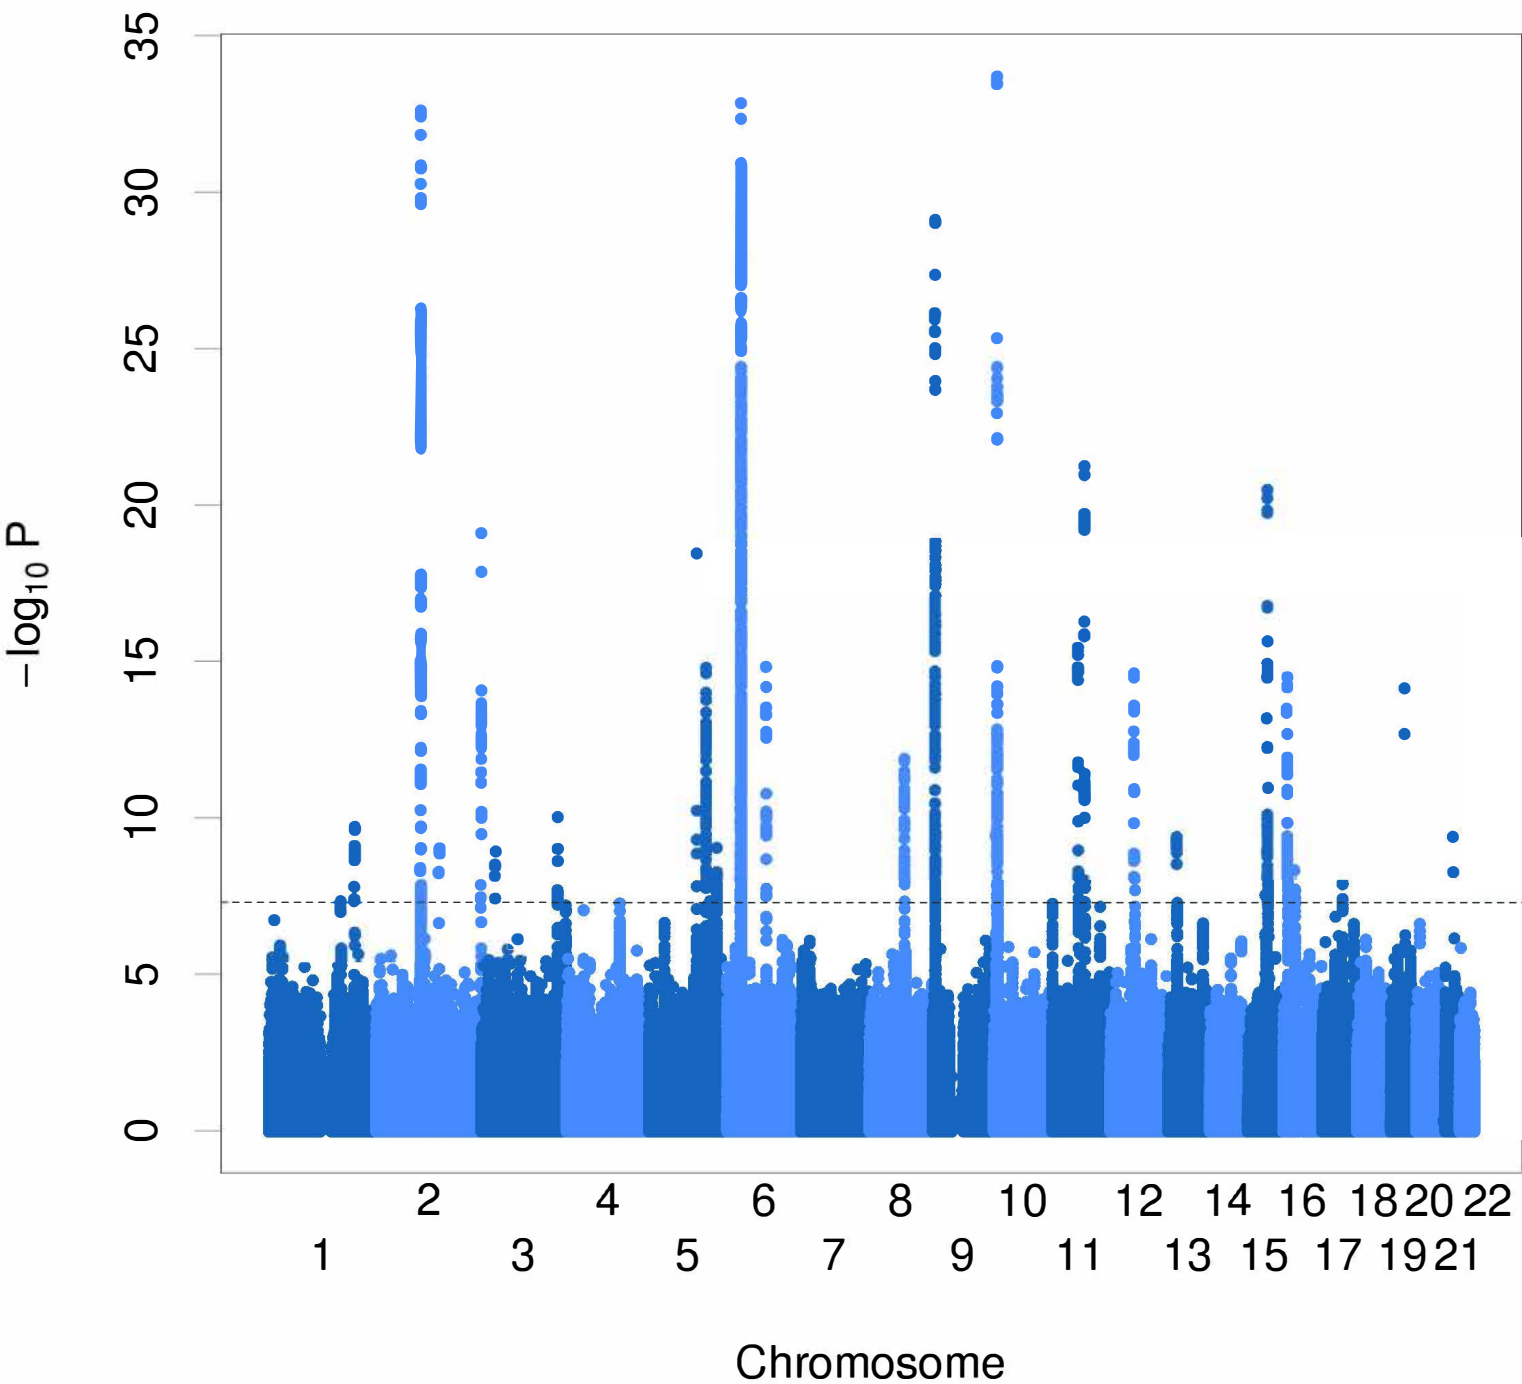

Supplement: NIHMS1545367-supplement-1.pdf [file NIHMS1545367-supplement-1.pdf]

**Figure S10. QQ-plot of non-atopic asthma**

**Lambda GC: 1.2**

**LDSC intercept: 1.0424 (0.012)**

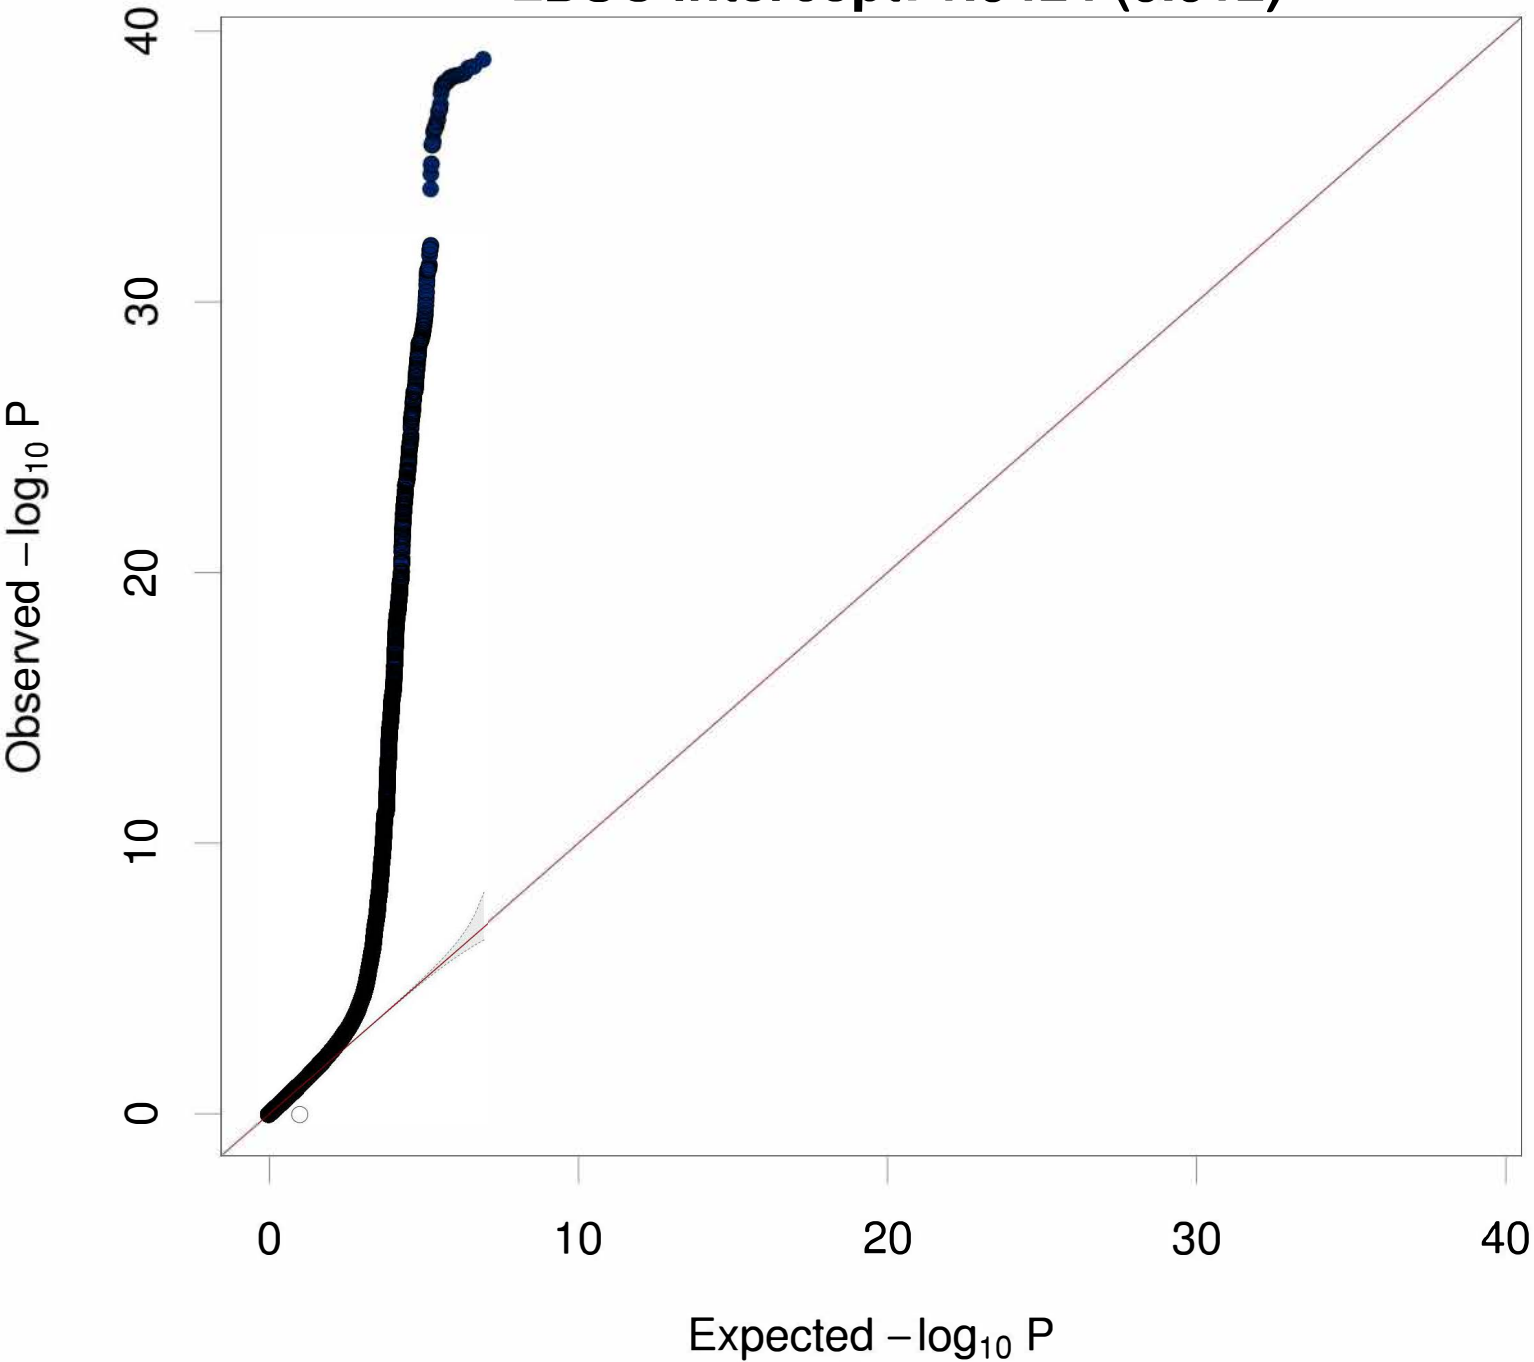

Supplement: NIHMS1545367-supplement-10.pdf [file NIHMS1545367-supplement-10.pdf]

**Figure S11. QQ-plot of Atopic asthma**

**Lambda GC: 1.254**

**LDSC intercept: 1.0473 (0.0156)**

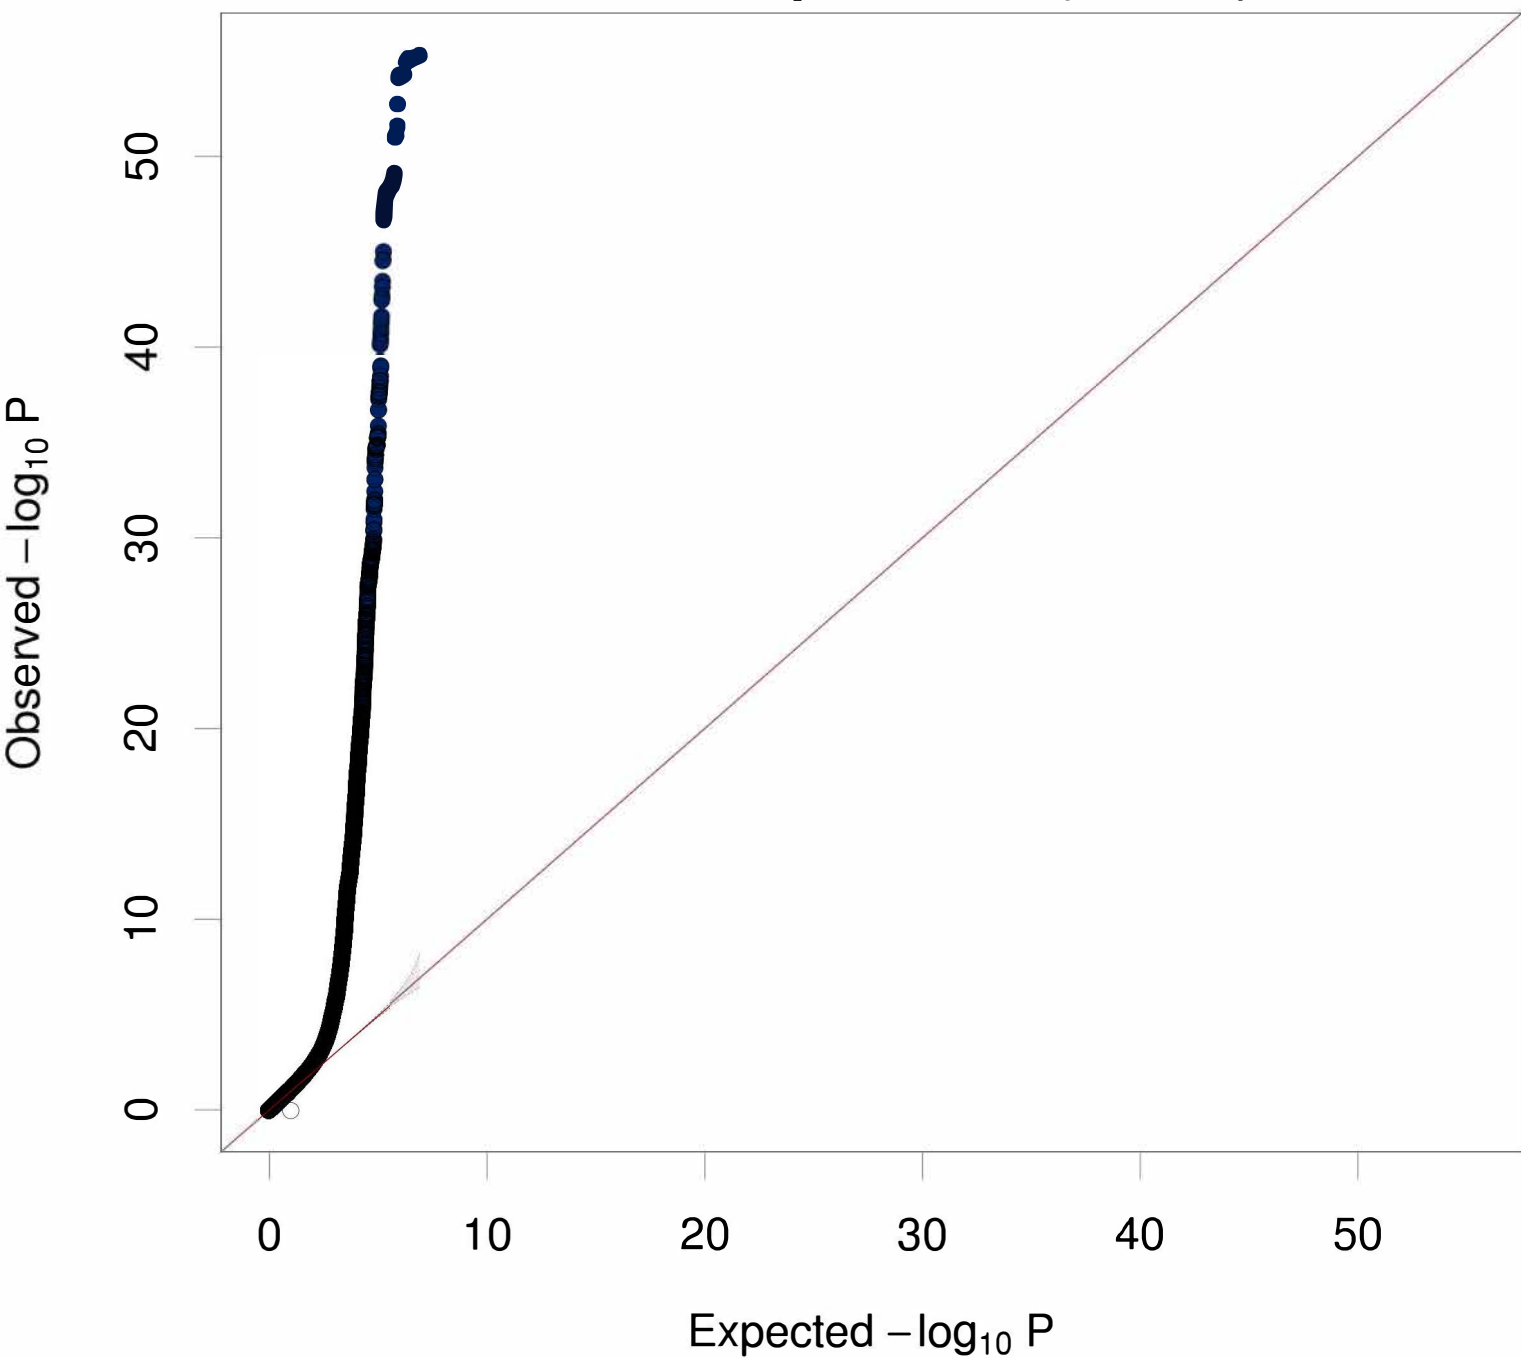

Supplement: NIHMS1545367-supplement-11.pdf [file NIHMS1545367-supplement-11.pdf]

**Figure S12. QQ-plot of BMI**  
**Lambda GC: 2.566**  
**LDSC intercept: 1.1234 (0.0297)**

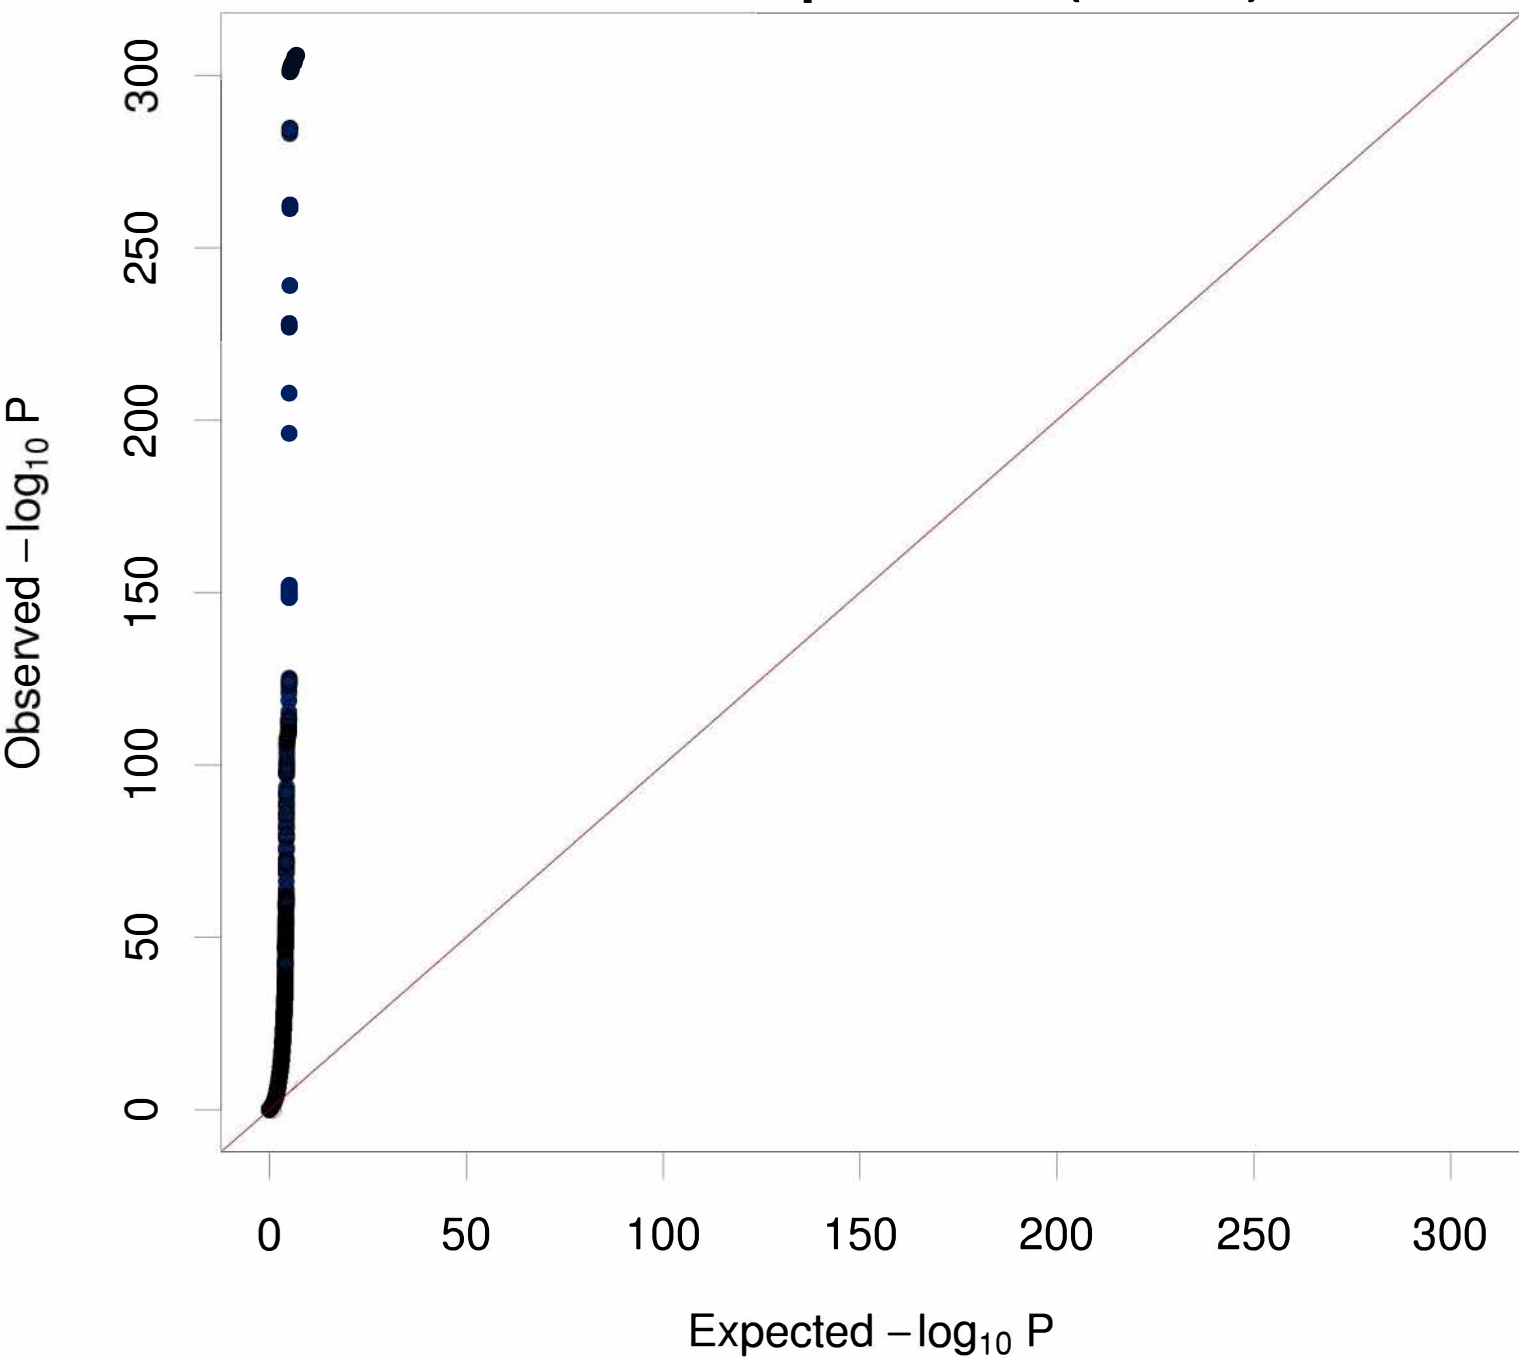

Supplement: NIHMS1545367-supplement-12.pdf [file NIHMS1545367-supplement-12.pdf]

**Figure S13. QQ-plot of waist-hip ratio adjusted by BMI**  
**Lambda GC: 1.767**  
**LDSC intercept: 1.1938 (0.0389)**

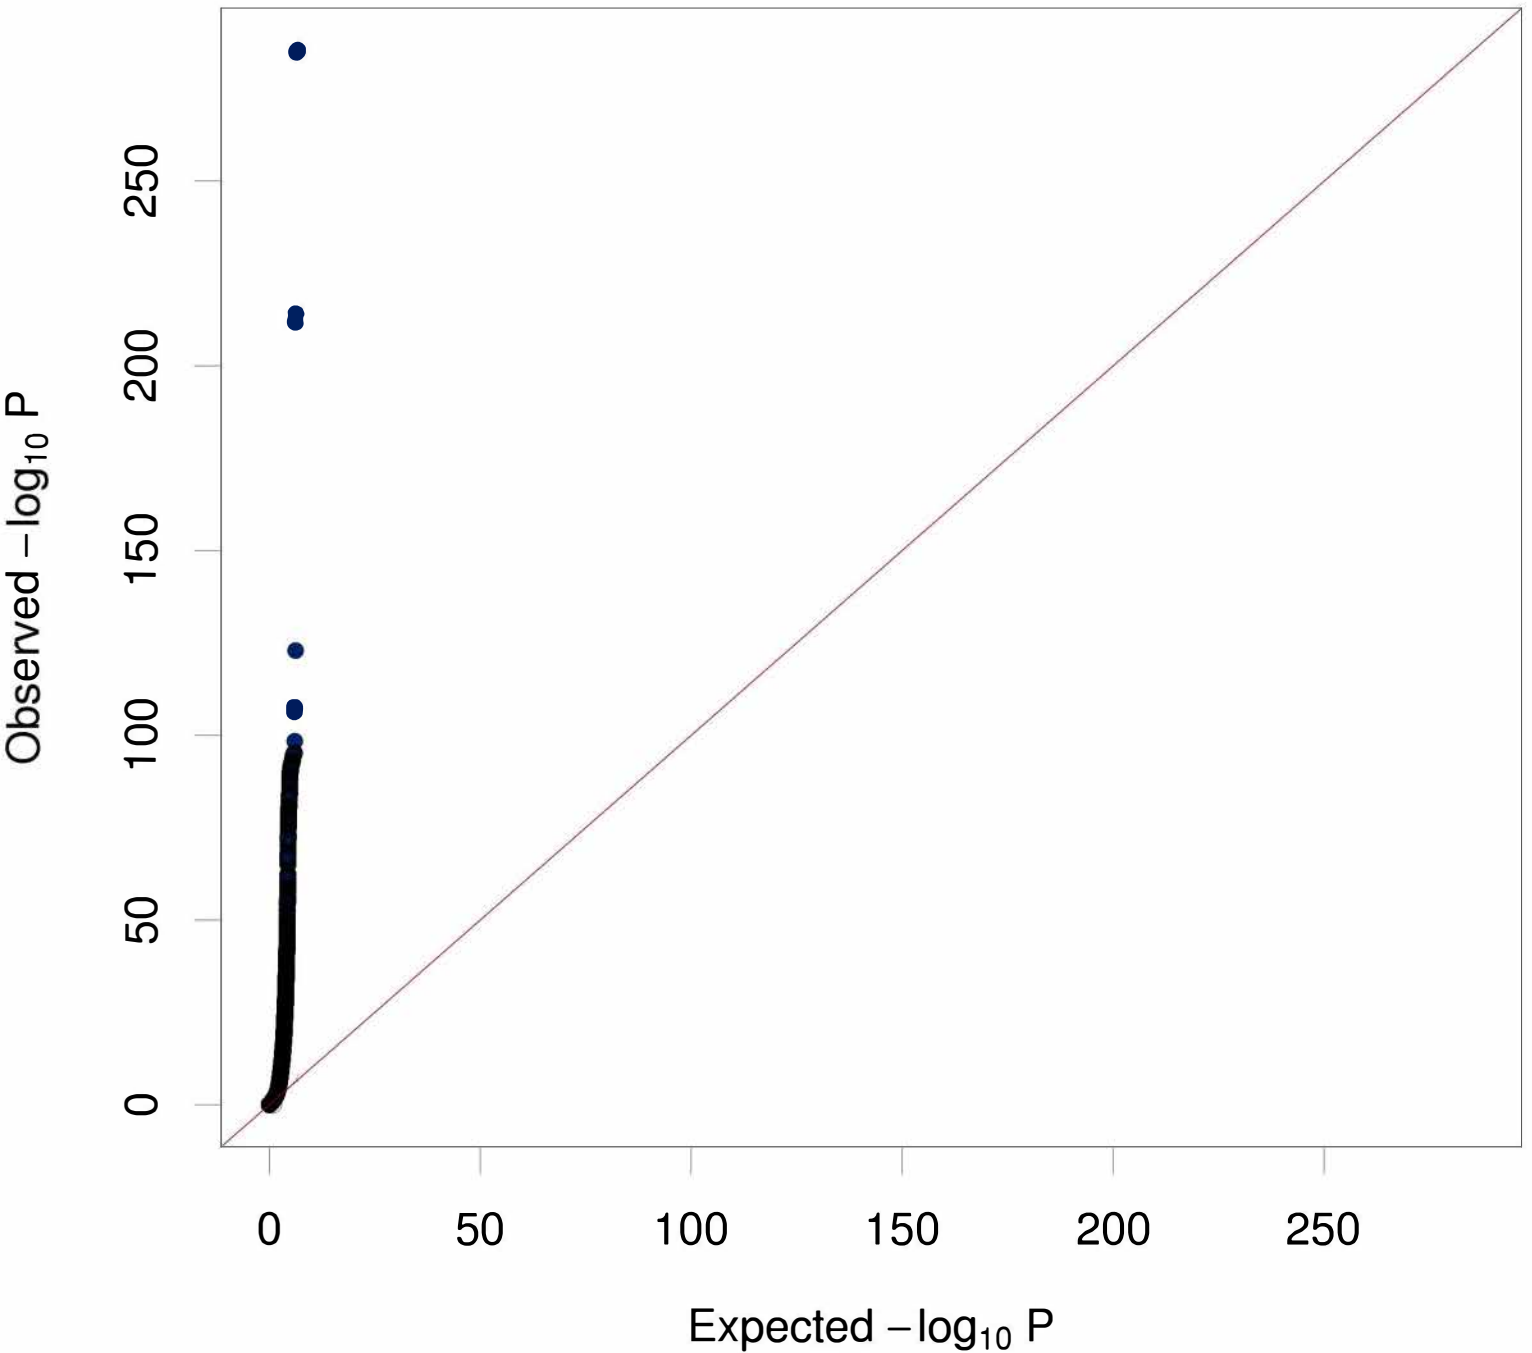

Supplement: NIHMS1545367-supplement-13.pdf [file NIHMS1545367-supplement-13.pdf]

**Figure S14. QQ-plot of waist circumference adjusted by BMI**  
**Lambda GC: 1.842**  
**LDSC intercept: 1.1708 (0.0334)**

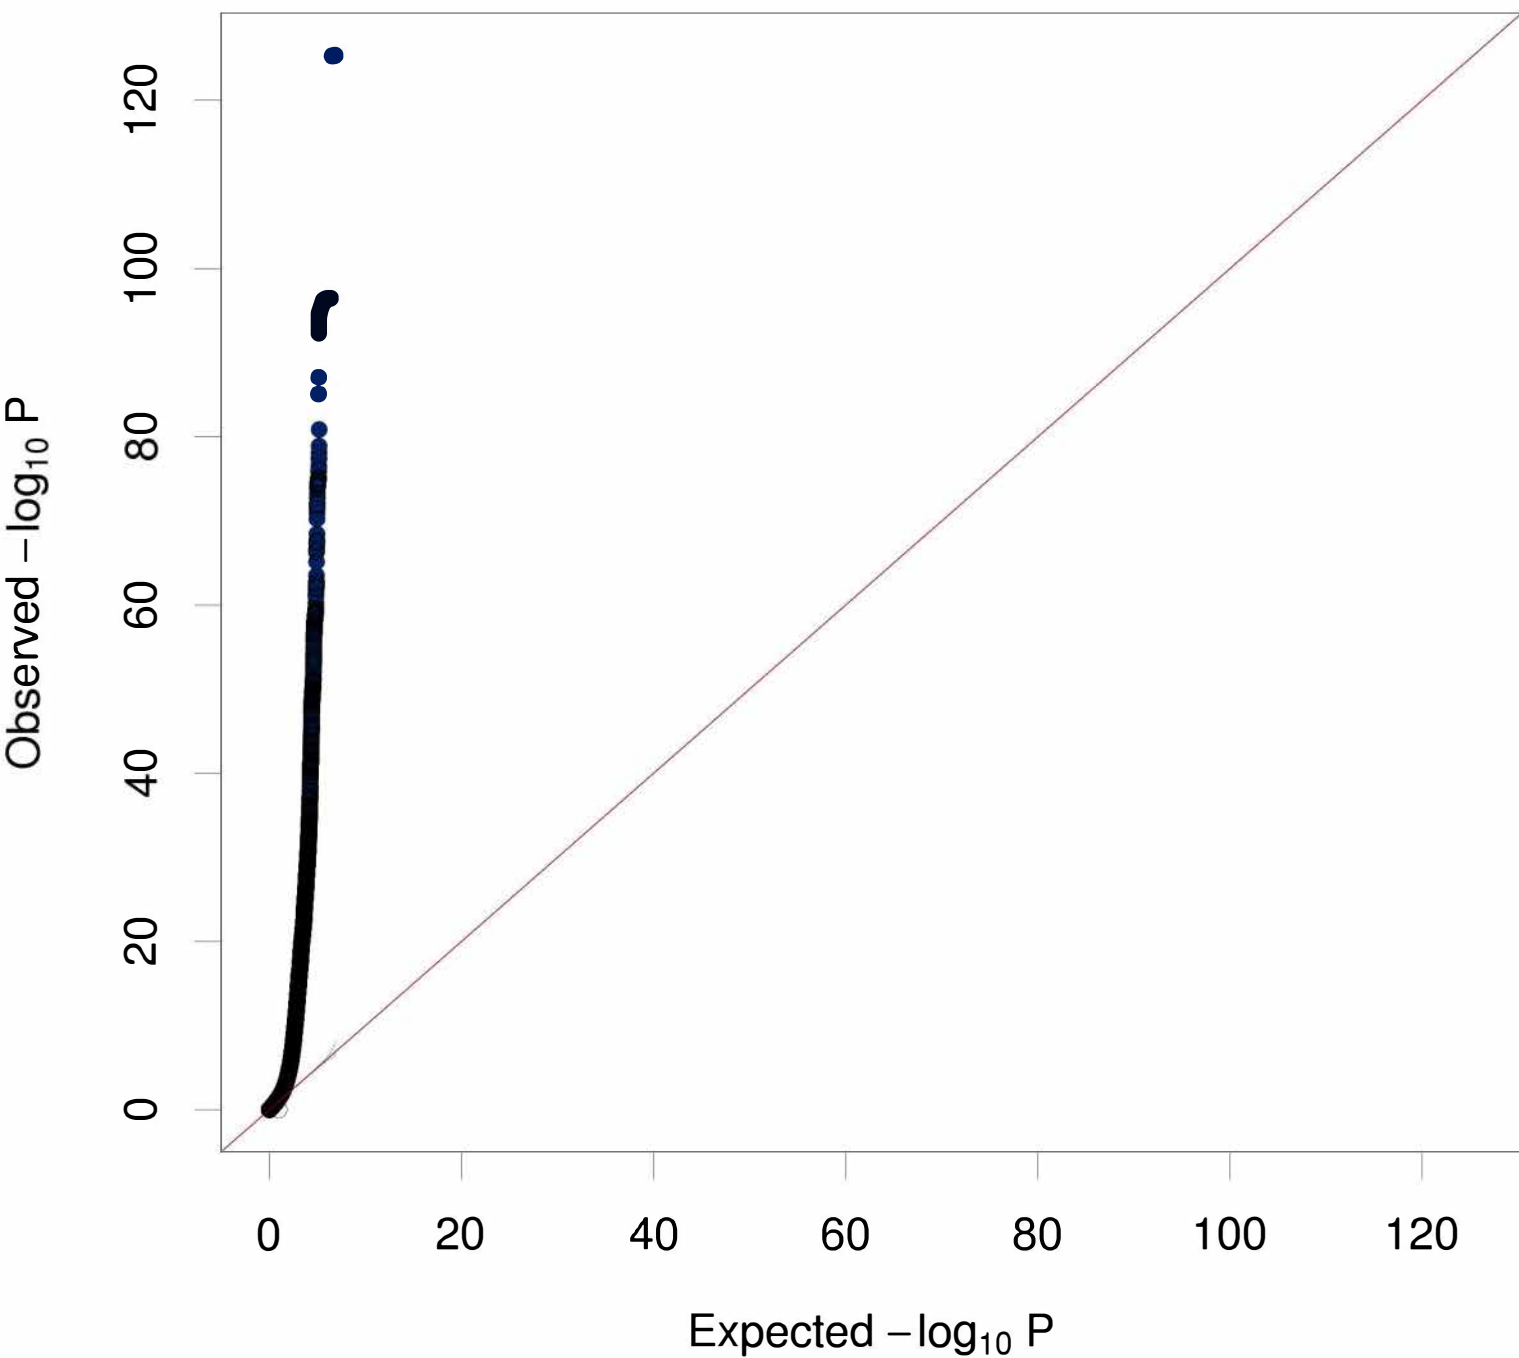

Supplement: NIHMS1545367-supplement-14.pdf [file NIHMS1545367-supplement-14.pdf]

# Colocalization of later-onset asthma and BMI cross-trait meta-analysis loci and GTEx eQTL

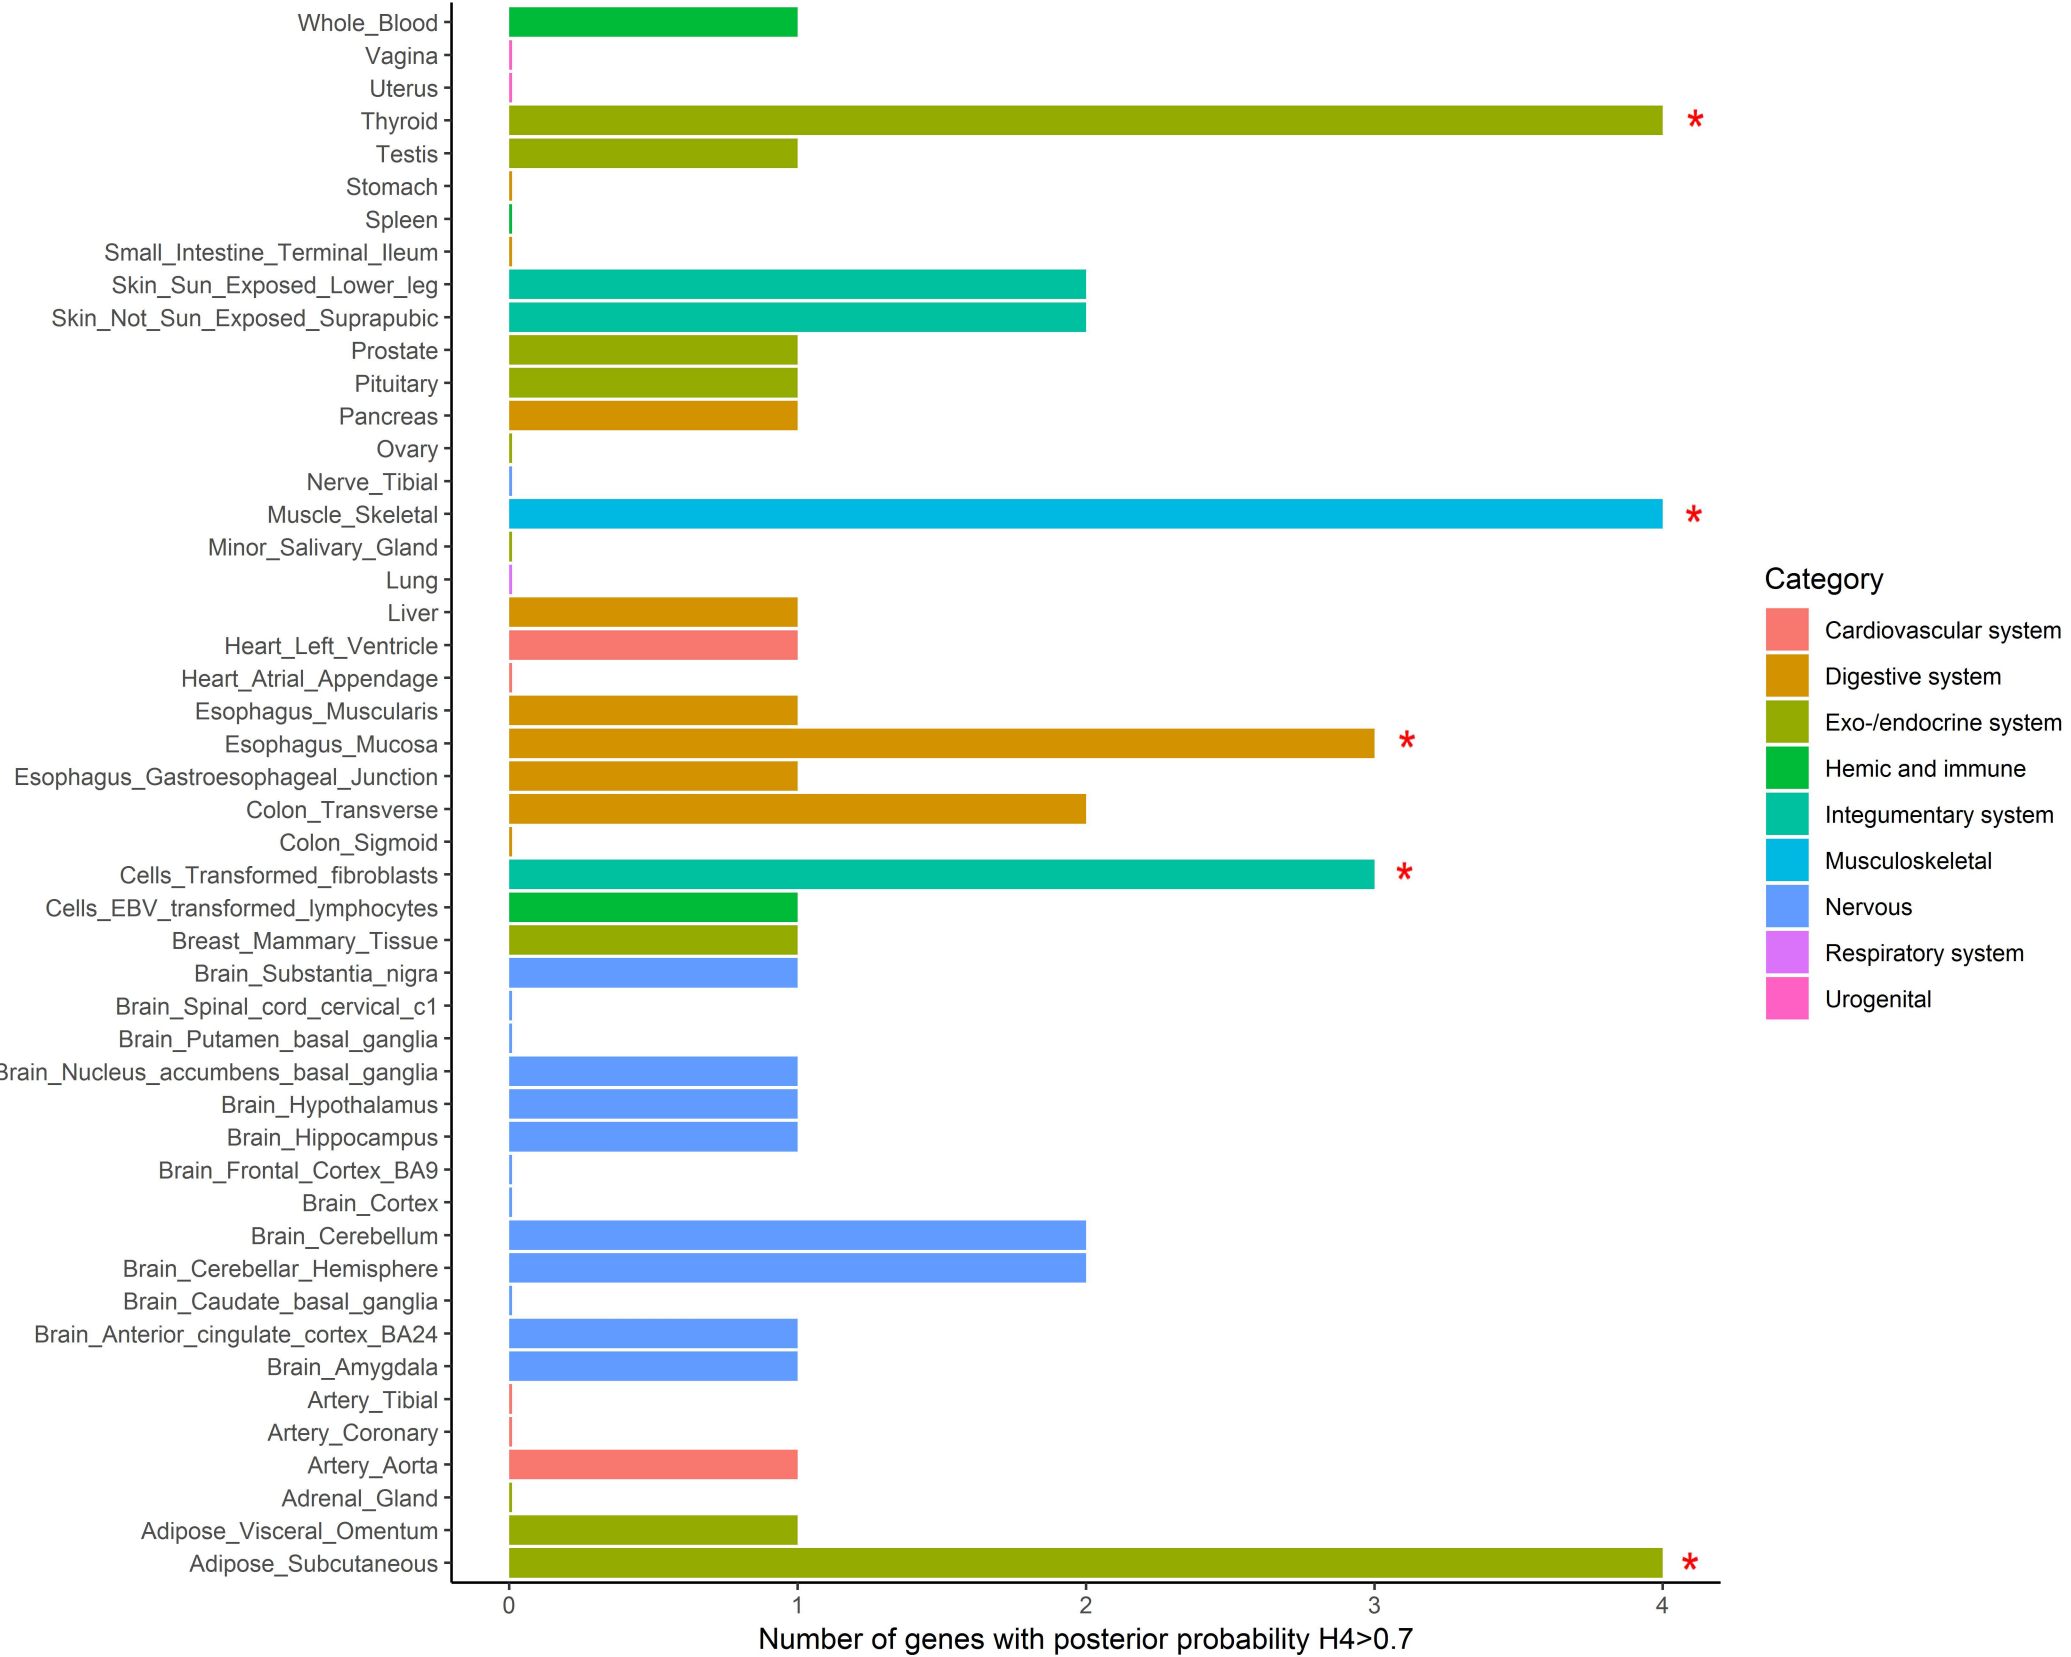

Supplement: NIHMS1545367-supplement-15.pdf [file NIHMS1545367-supplement-15.pdf]

# Colocalization of later-onset asthma and FG cross-trait meta-analysis loci and GTEx eQTL

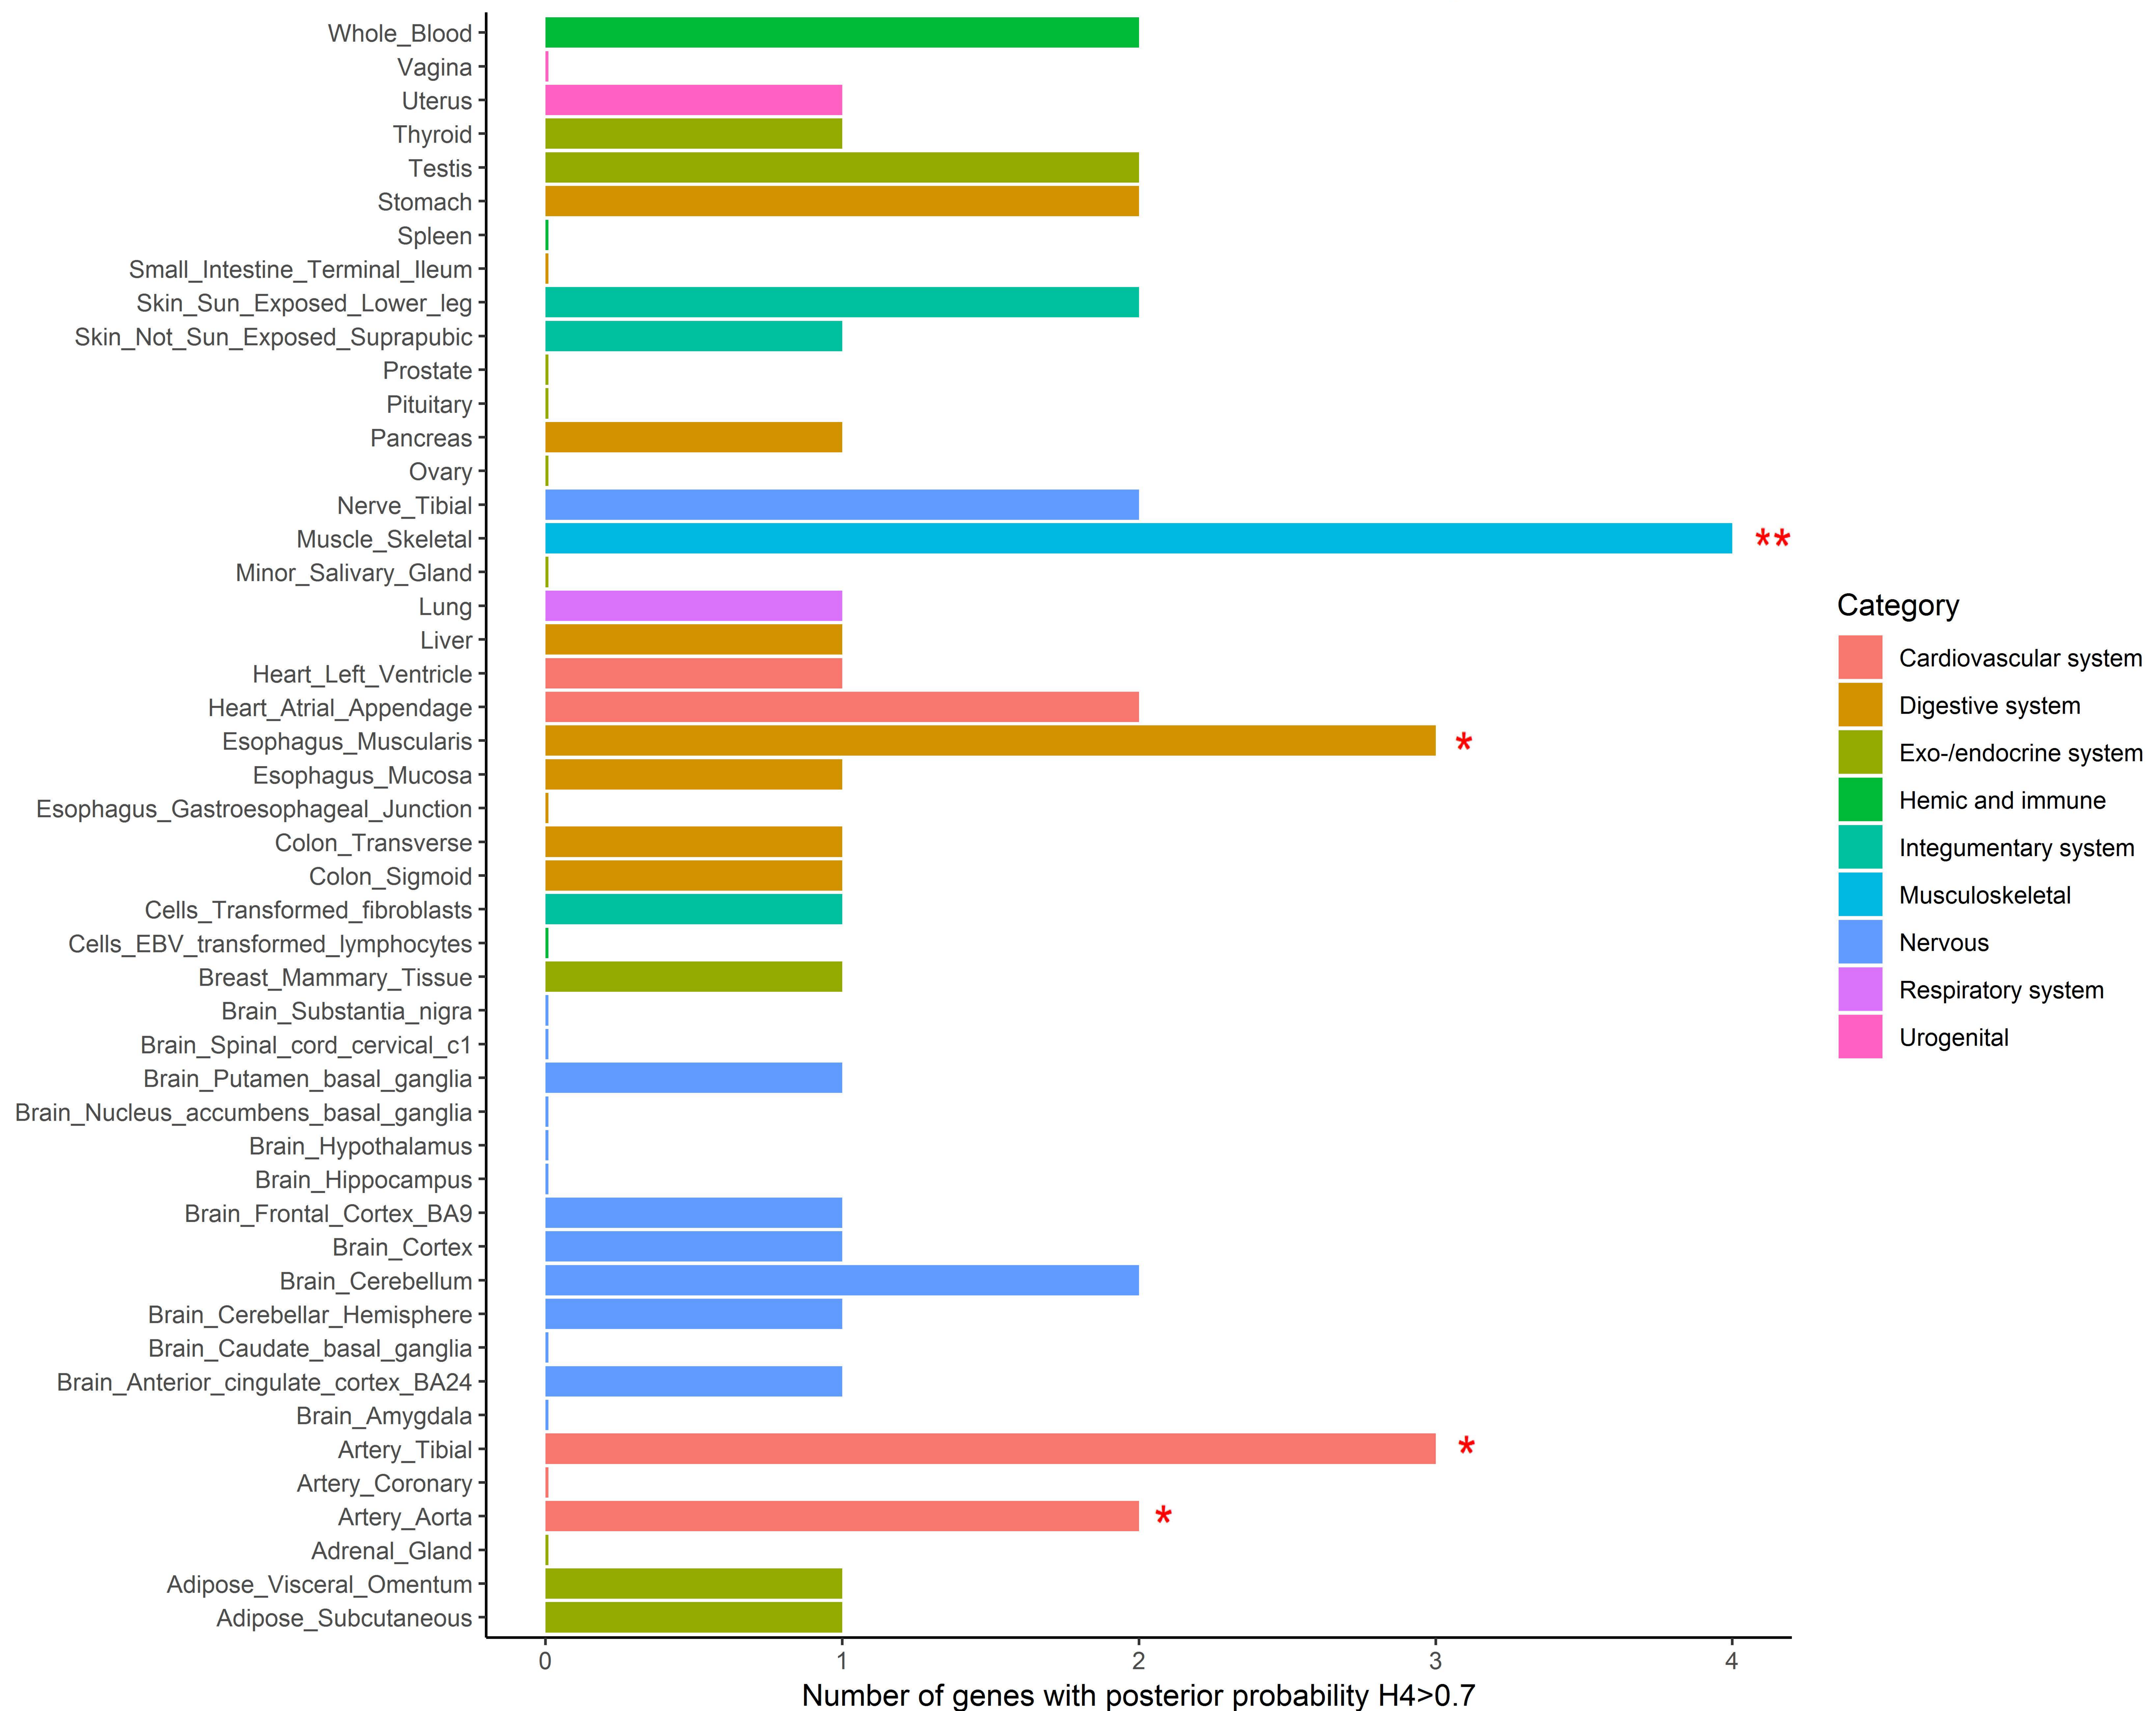

Supplement: NIHMS1545367-supplement-17.pdf [file NIHMS1545367-supplement-17.pdf]

# Colocalization of non-atopic asthma and BMI cross-trait meta-analysis loci and GTEx eQTL

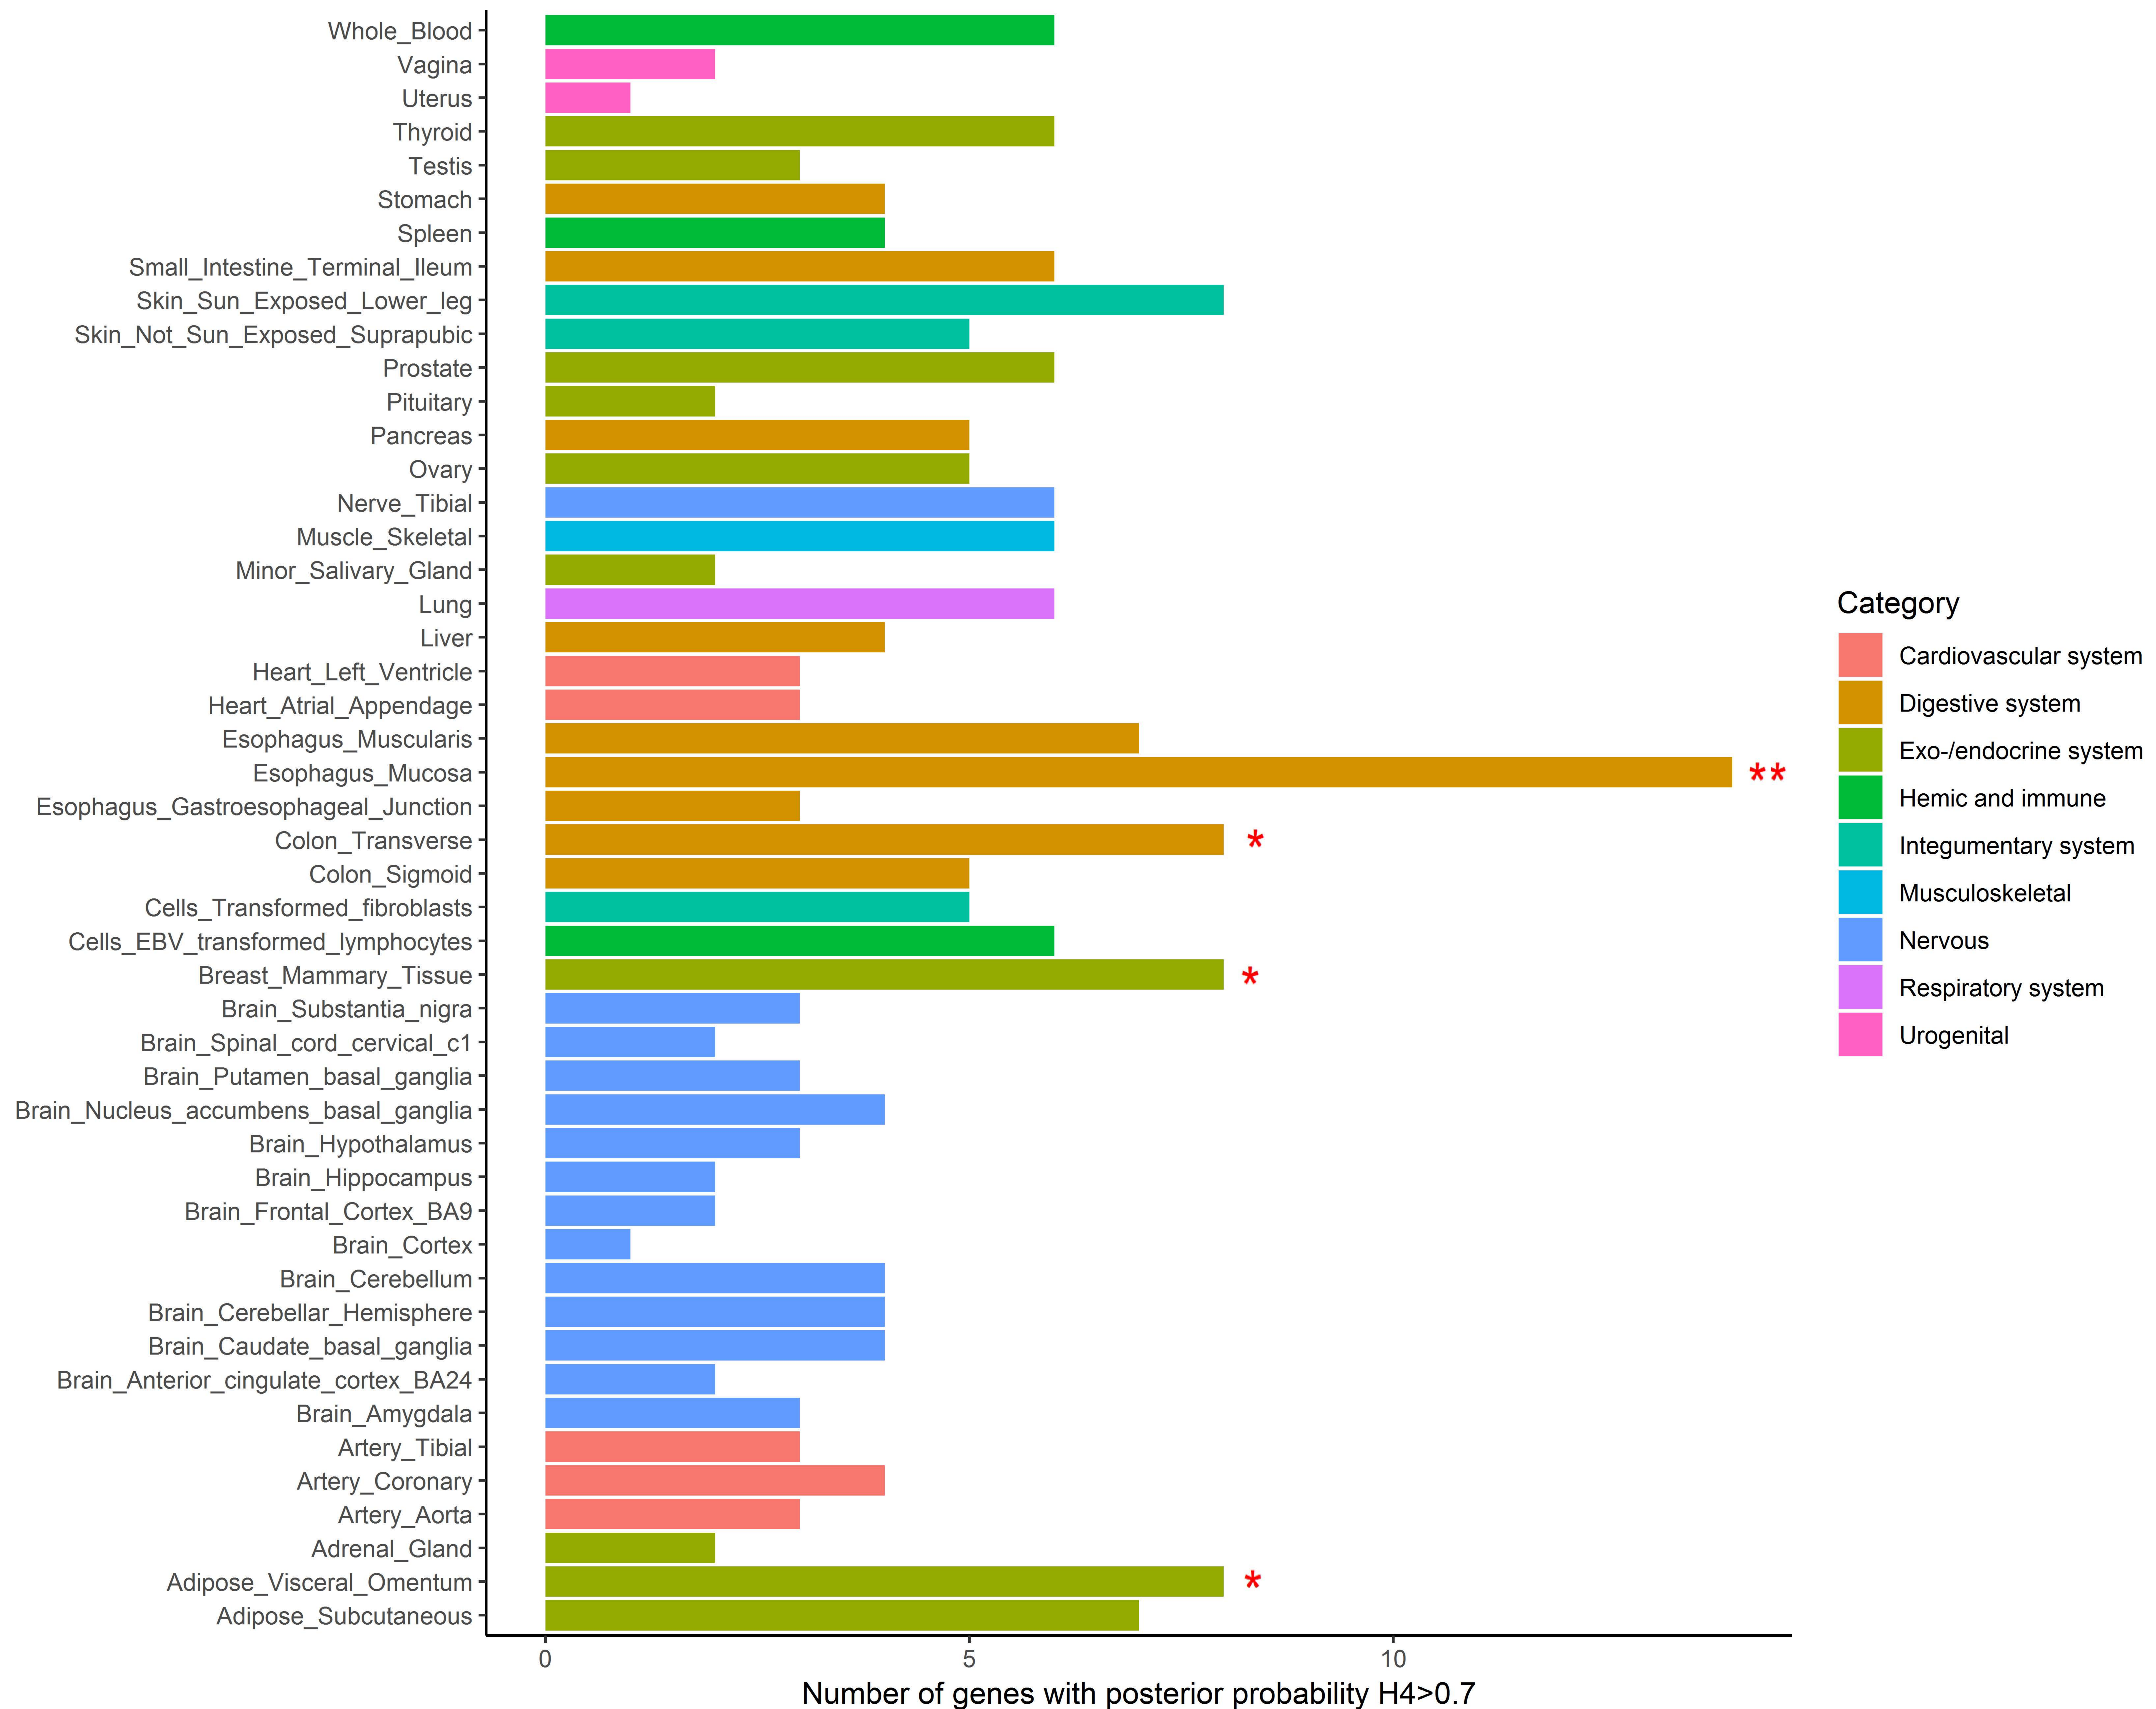

Supplement: NIHMS1545367-supplement-18.pdf [file NIHMS1545367-supplement-18.pdf]

**Figure S2. Manhattan plot of early-onset asthma**

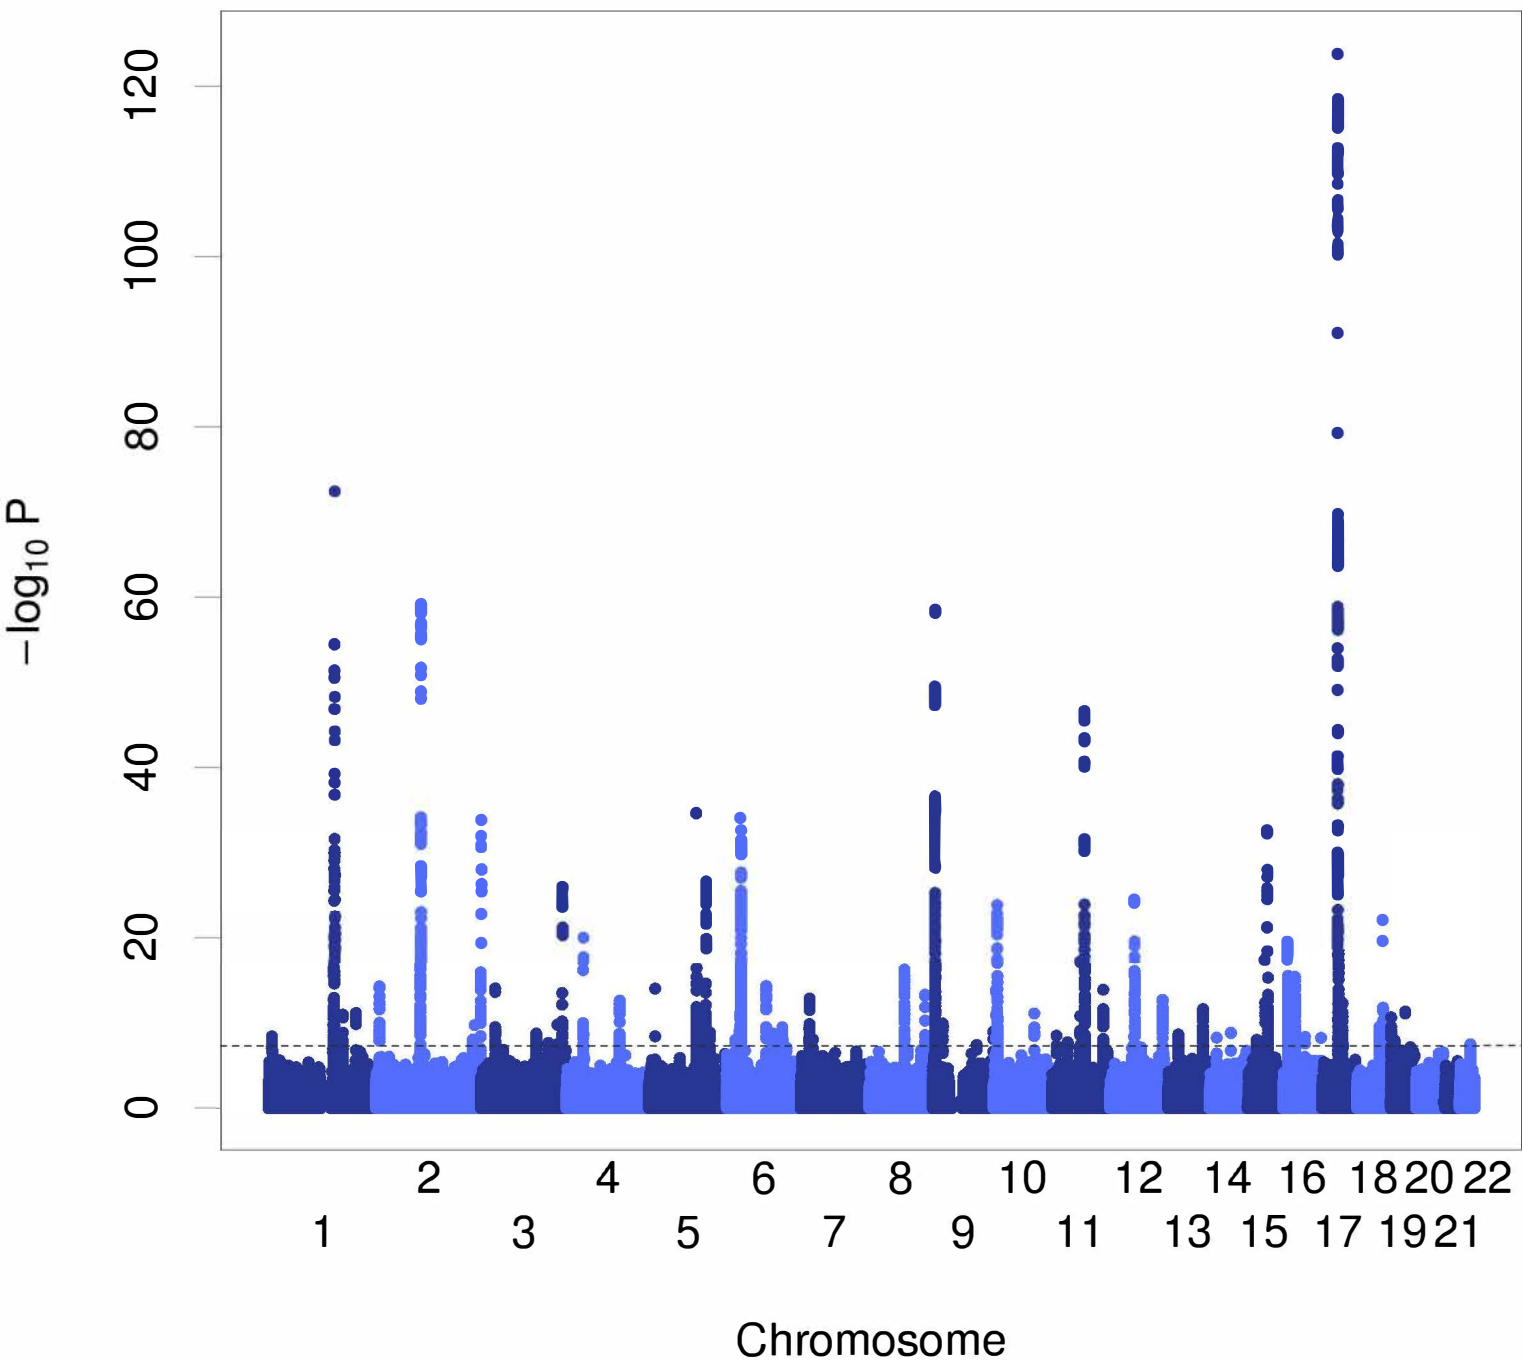

Supplement: NIHMS1545367-supplement-2.pdf [file NIHMS1545367-supplement-2.pdf]

# Colocalization of non-atopic asthma and FG cross-trait meta-analysis loci and GTEx eQTL

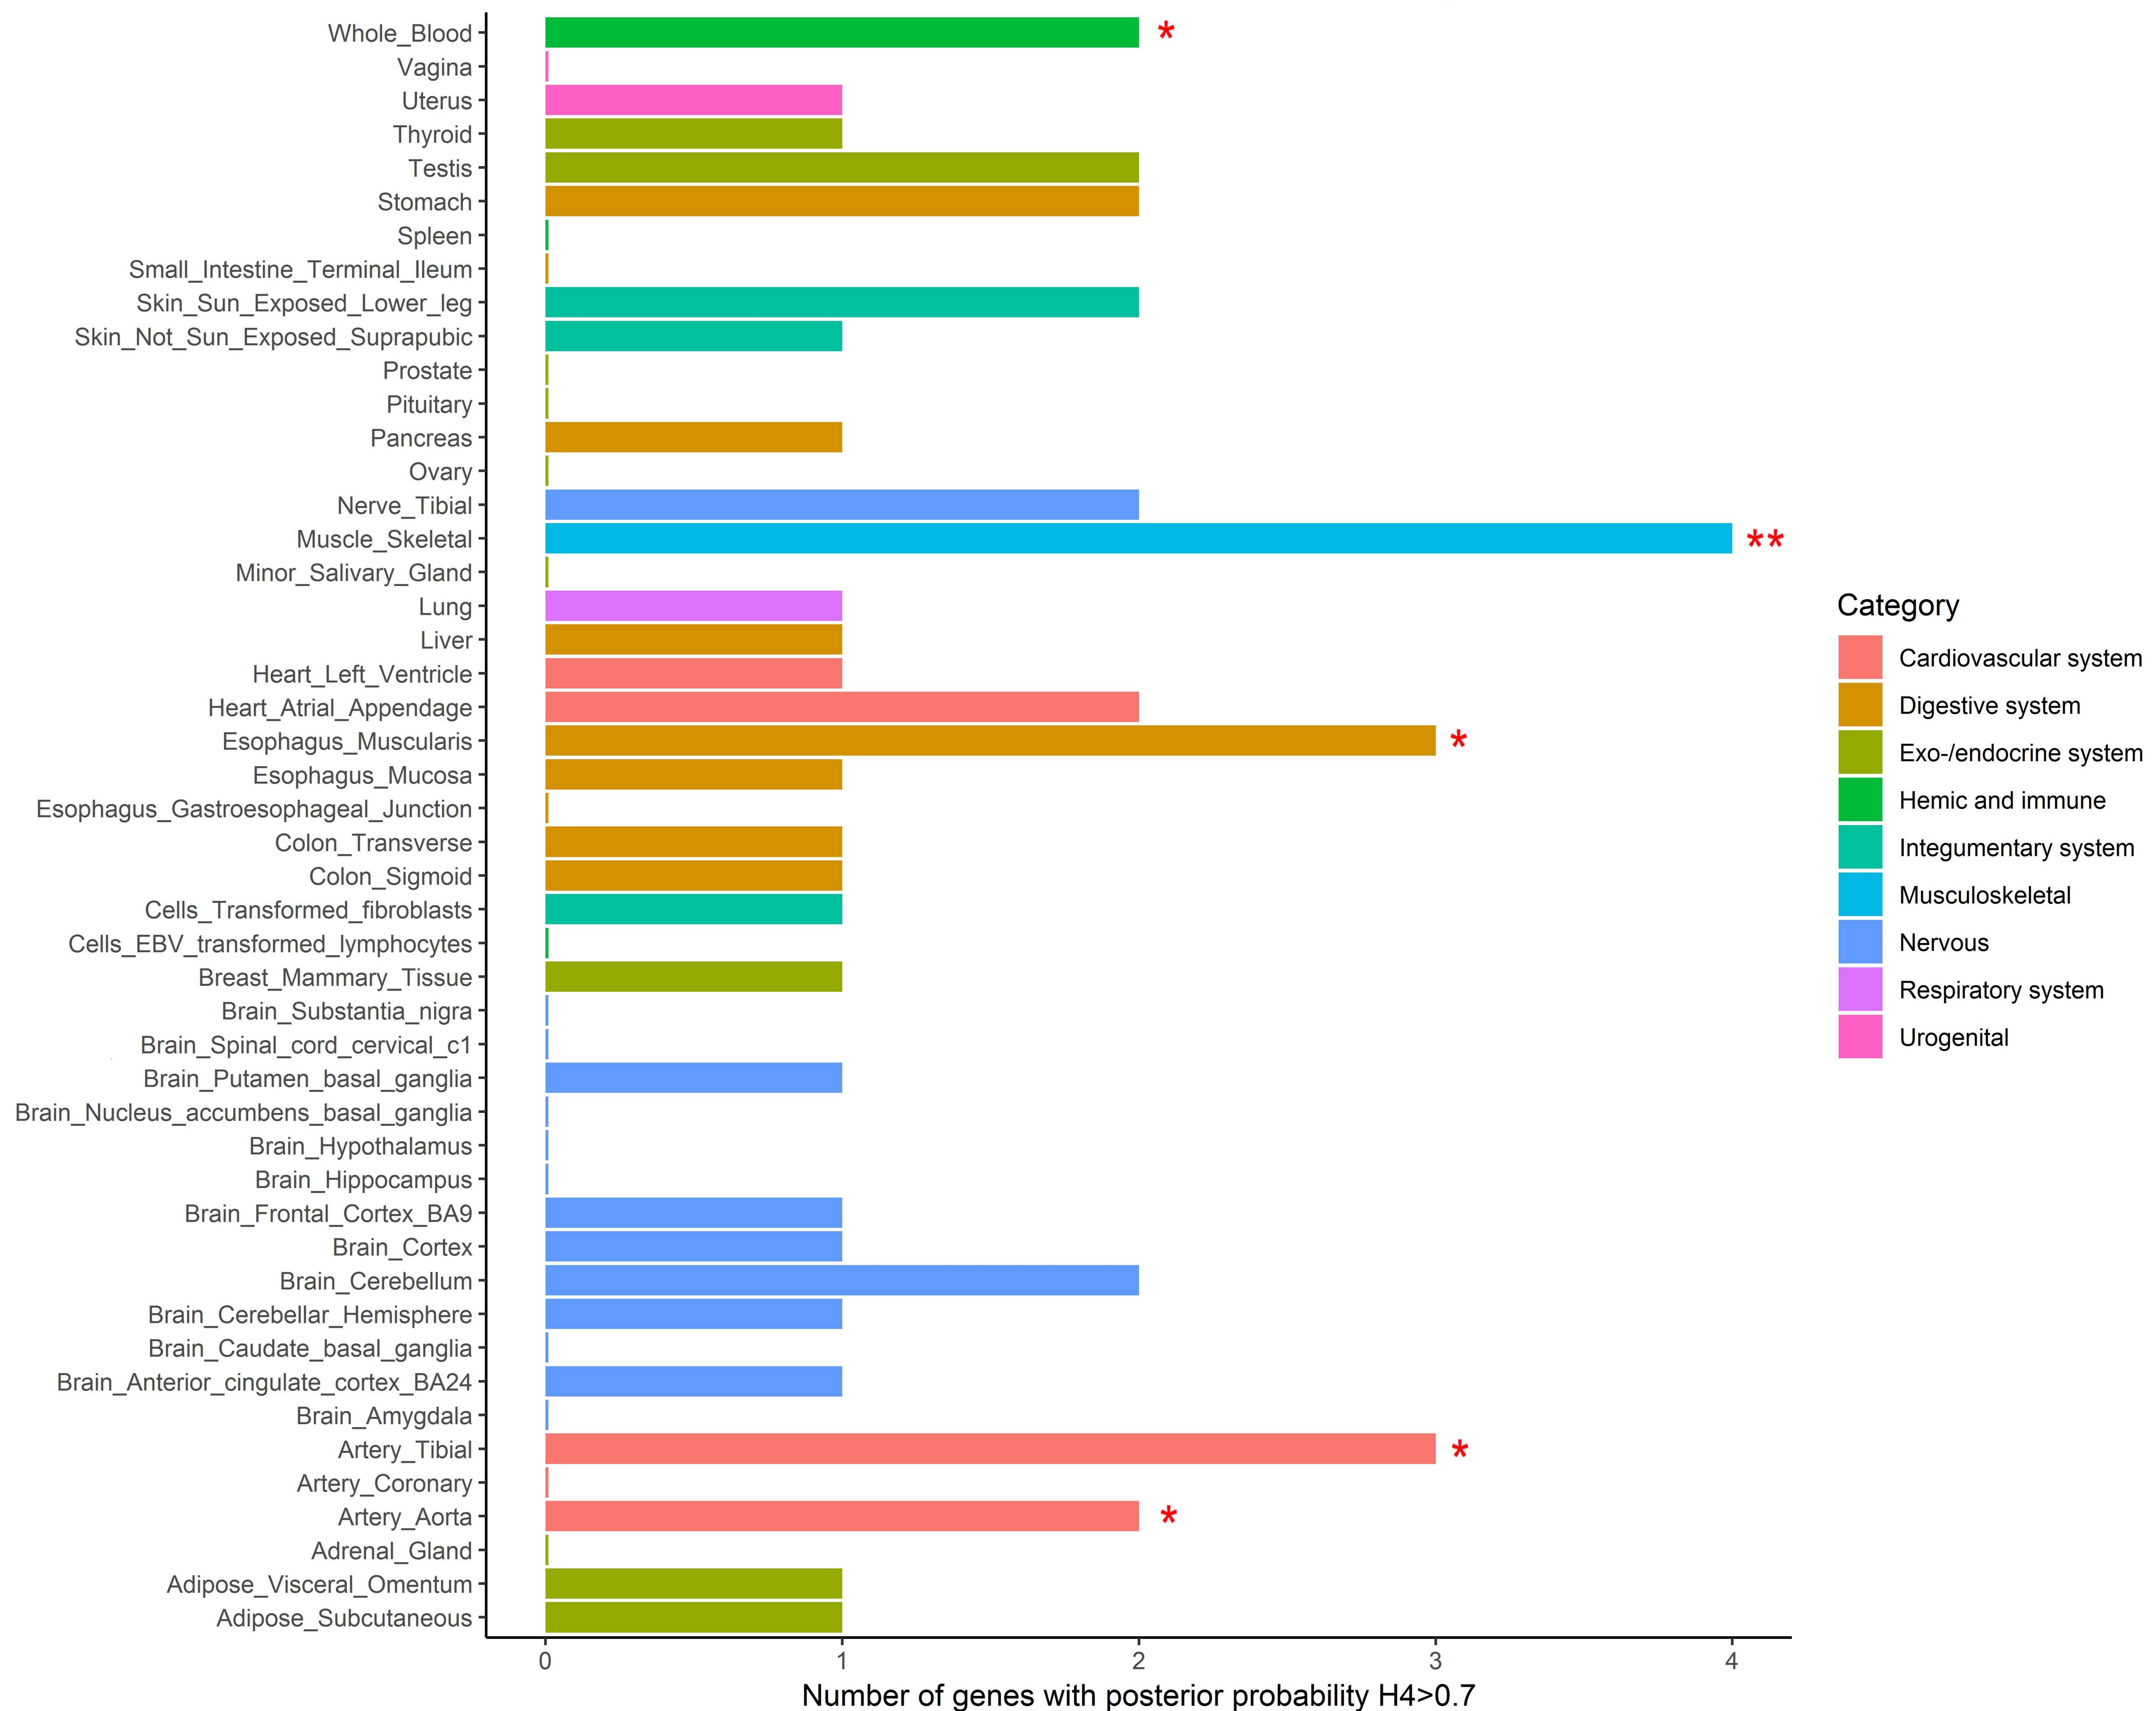

Supplement: NIHMS1545367-supplement-20.pdf [file NIHMS1545367-supplement-20.pdf]

**Figure S3. Manhattan plot of non-atopic asthma**

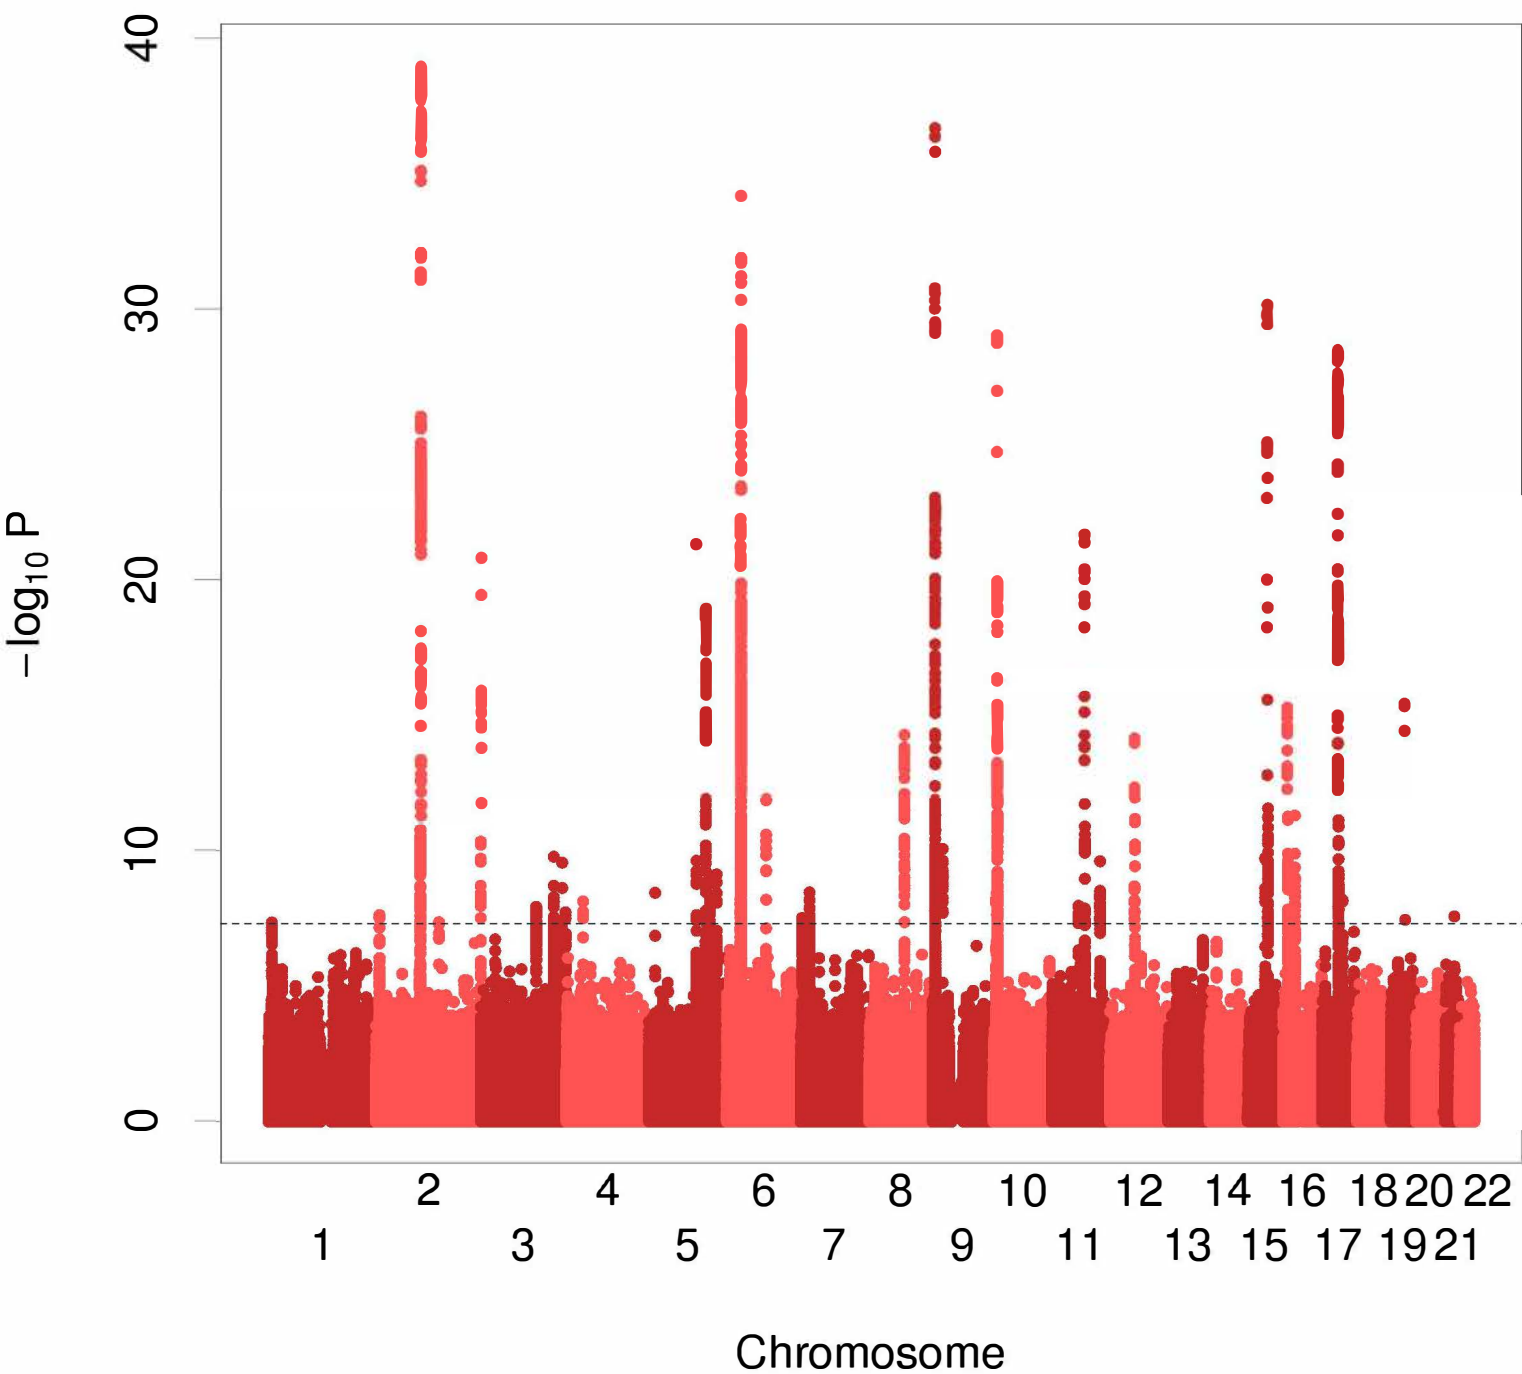

Supplement: NIHMS1545367-supplement-3.pdf [file NIHMS1545367-supplement-3.pdf]

**Figure S4. Manhattan plot of atopic asthma**

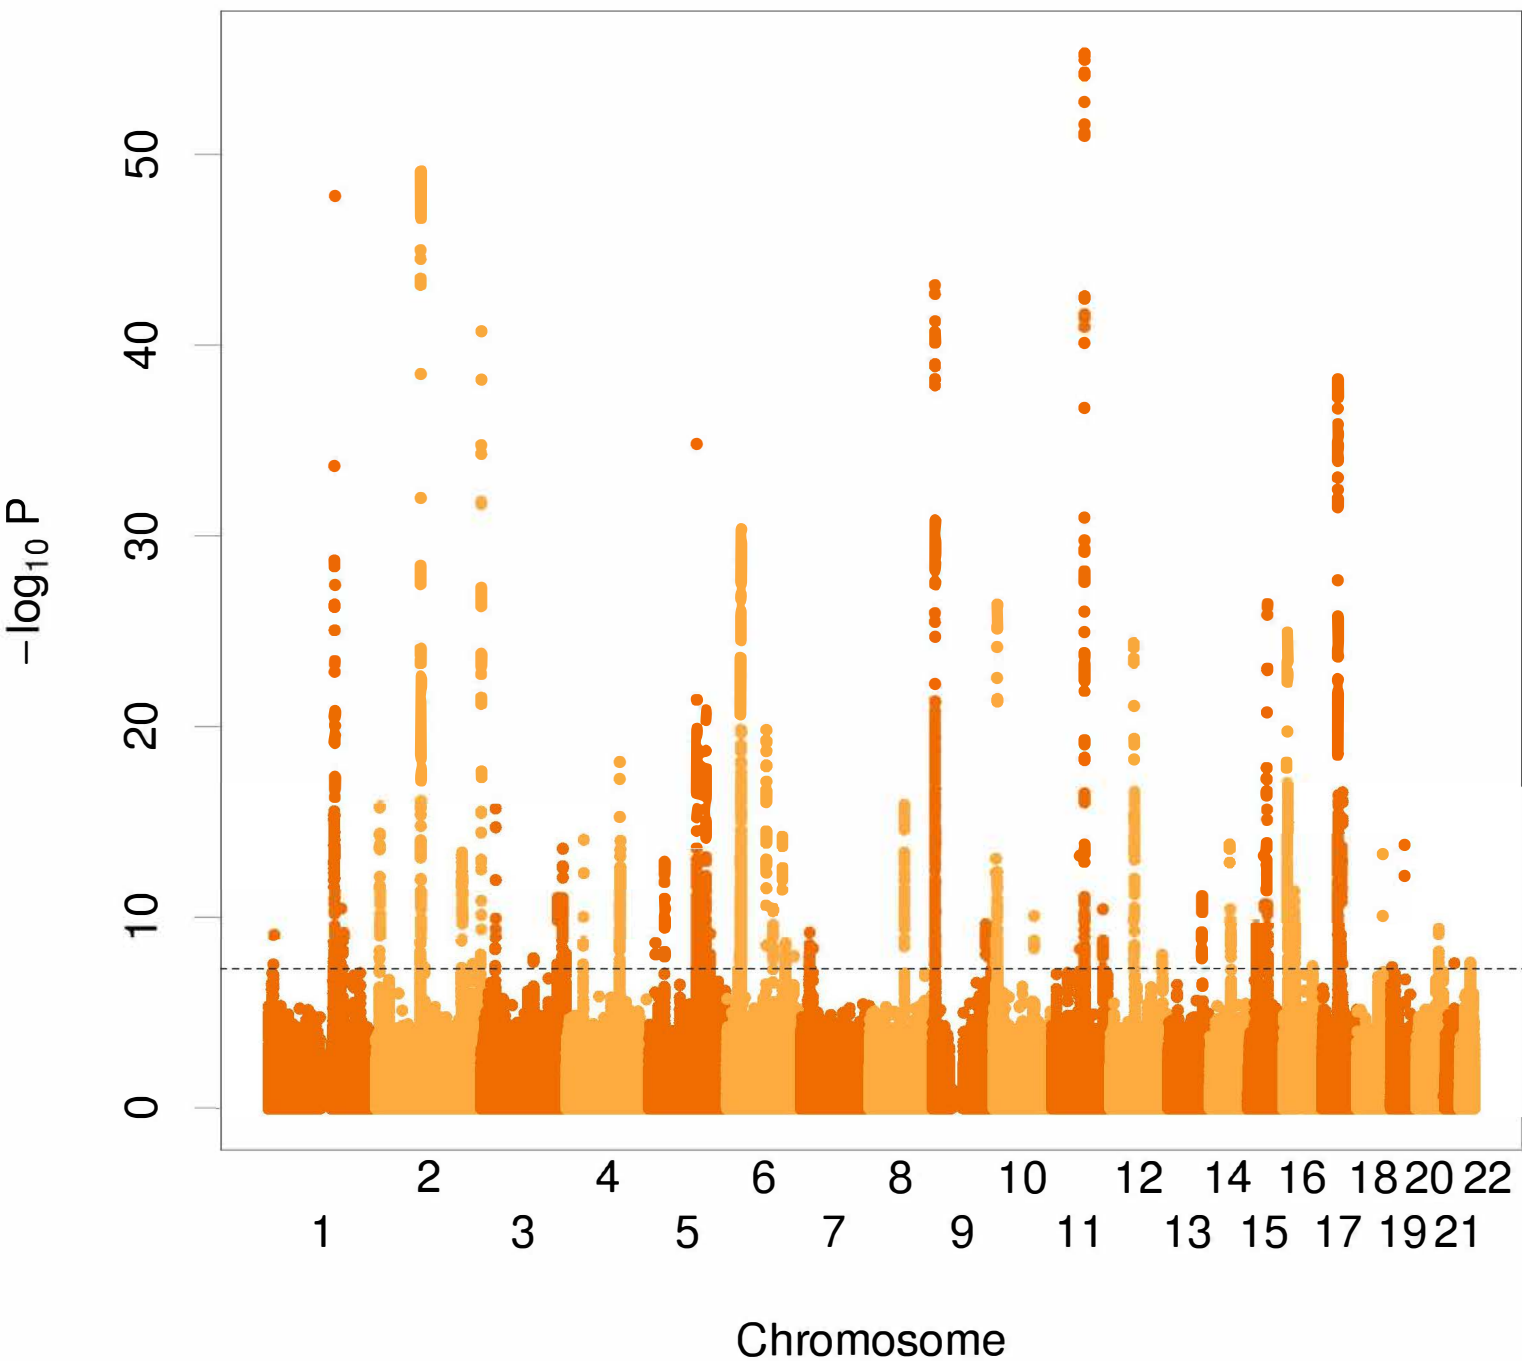

Supplement: NIHMS1545367-supplement-4.pdf [file NIHMS1545367-supplement-4.pdf]

**Figure S5. Manhattan plot of BMI**

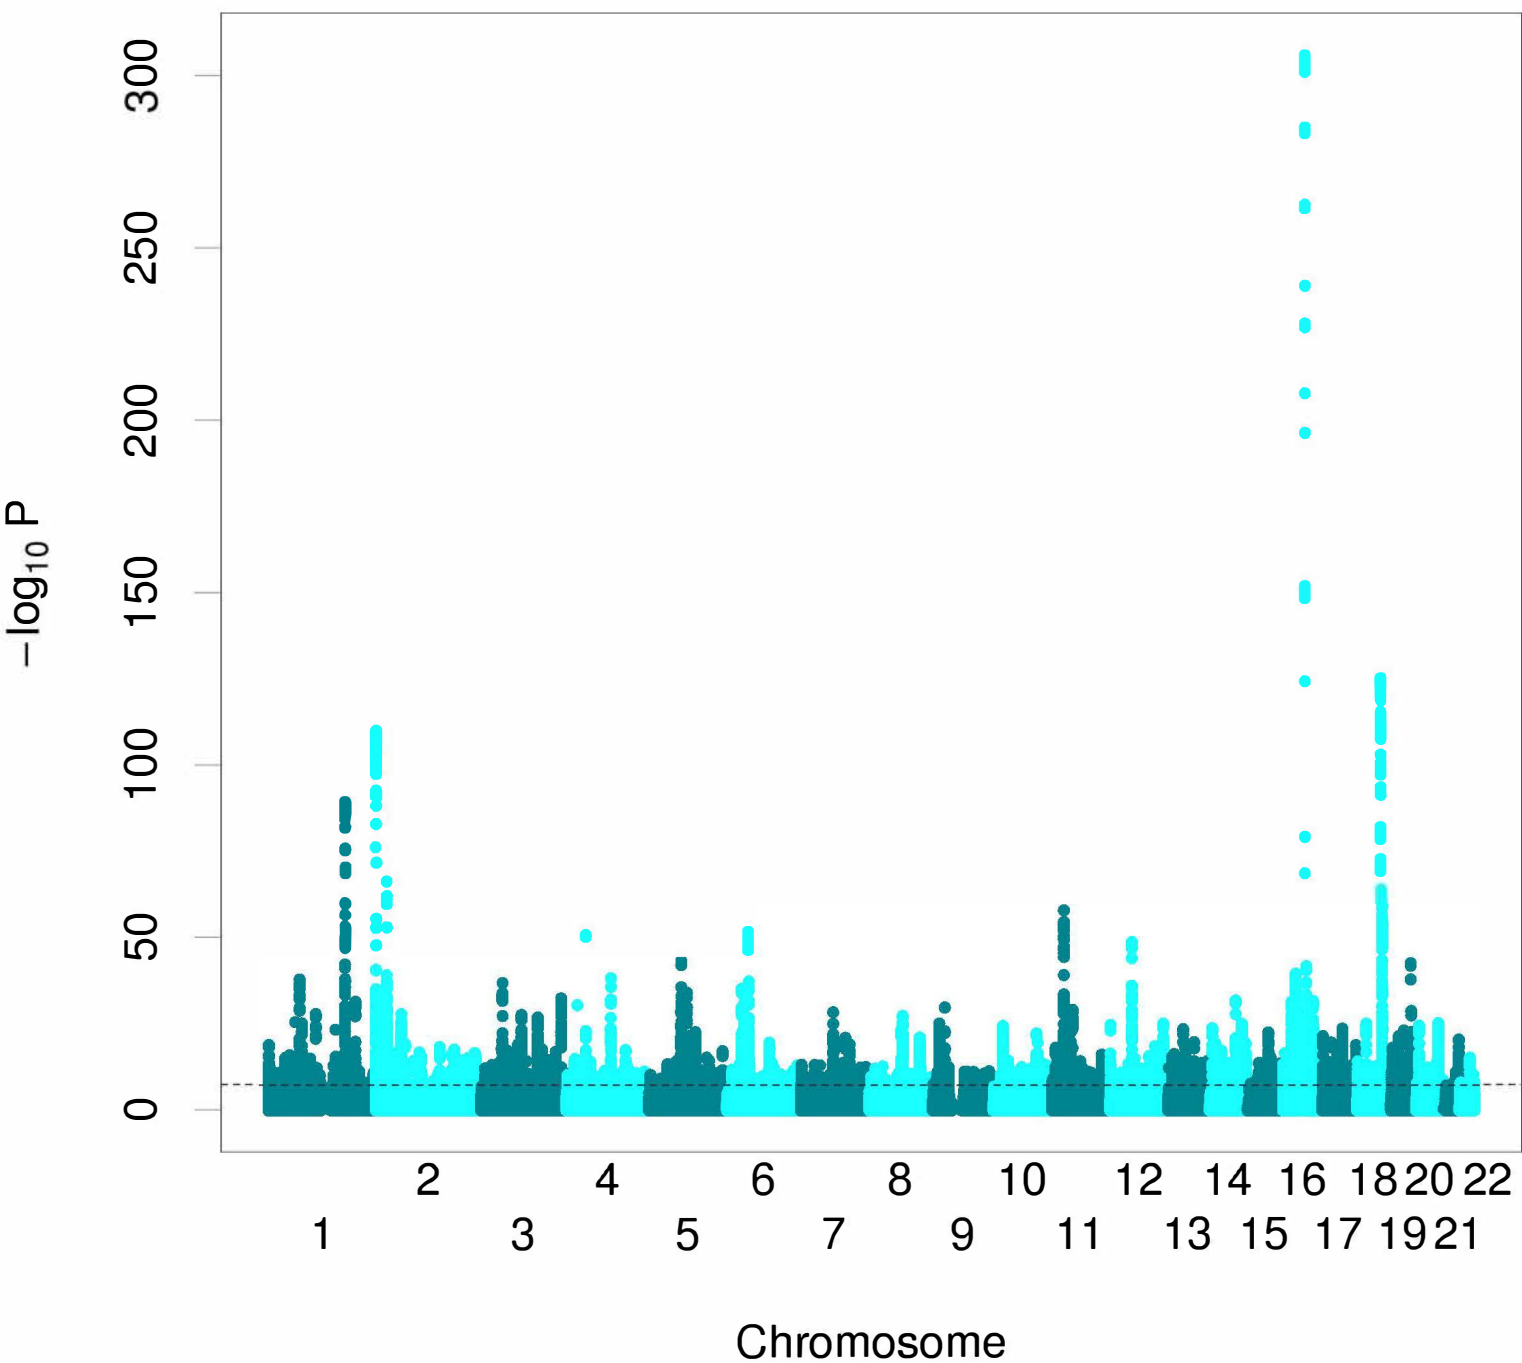

Supplement: NIHMS1545367-supplement-5.pdf [file NIHMS1545367-supplement-5.pdf]

**Figure S6. Manhattan plot of waist-hip ratio adjusted by BMI**

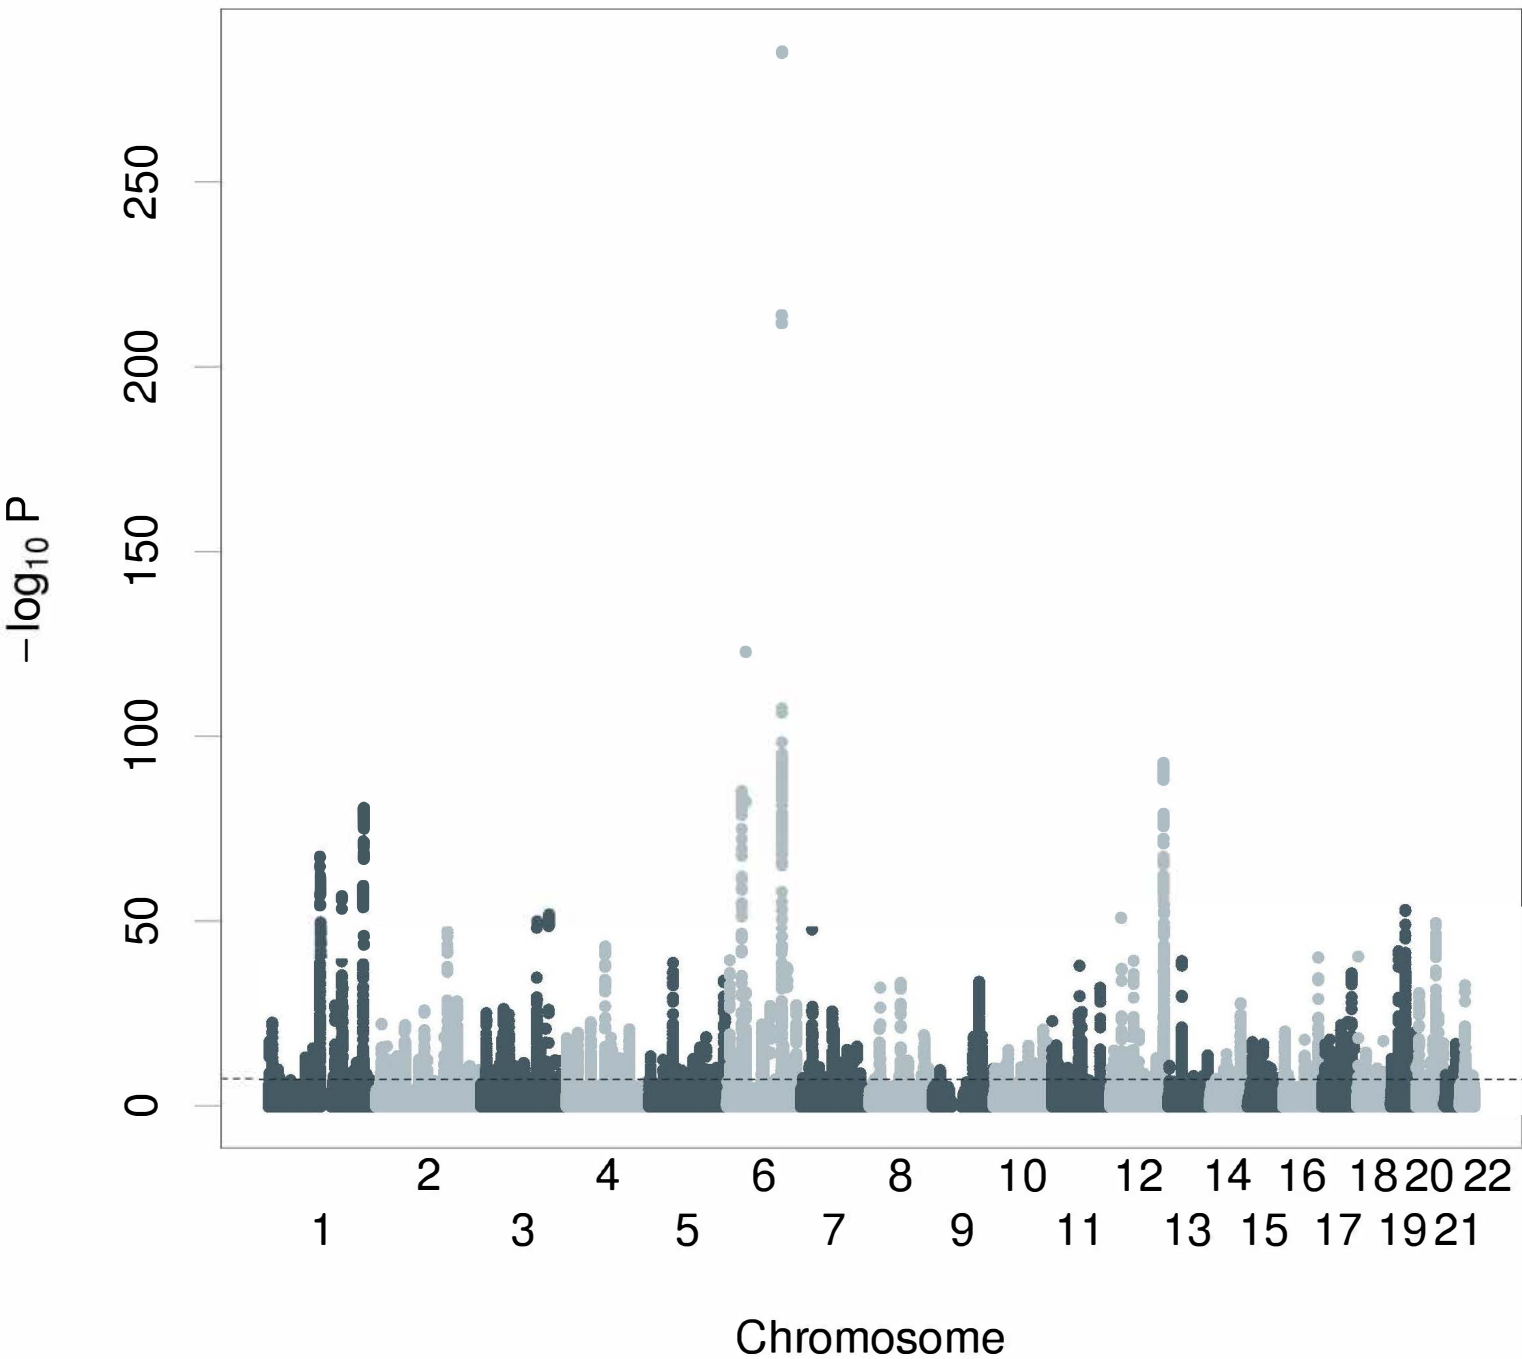

Supplement: NIHMS1545367-supplement-6.pdf [file NIHMS1545367-supplement-6.pdf]

**Figure S7. Manhattan plot of waist circumference adjusted by BMI**

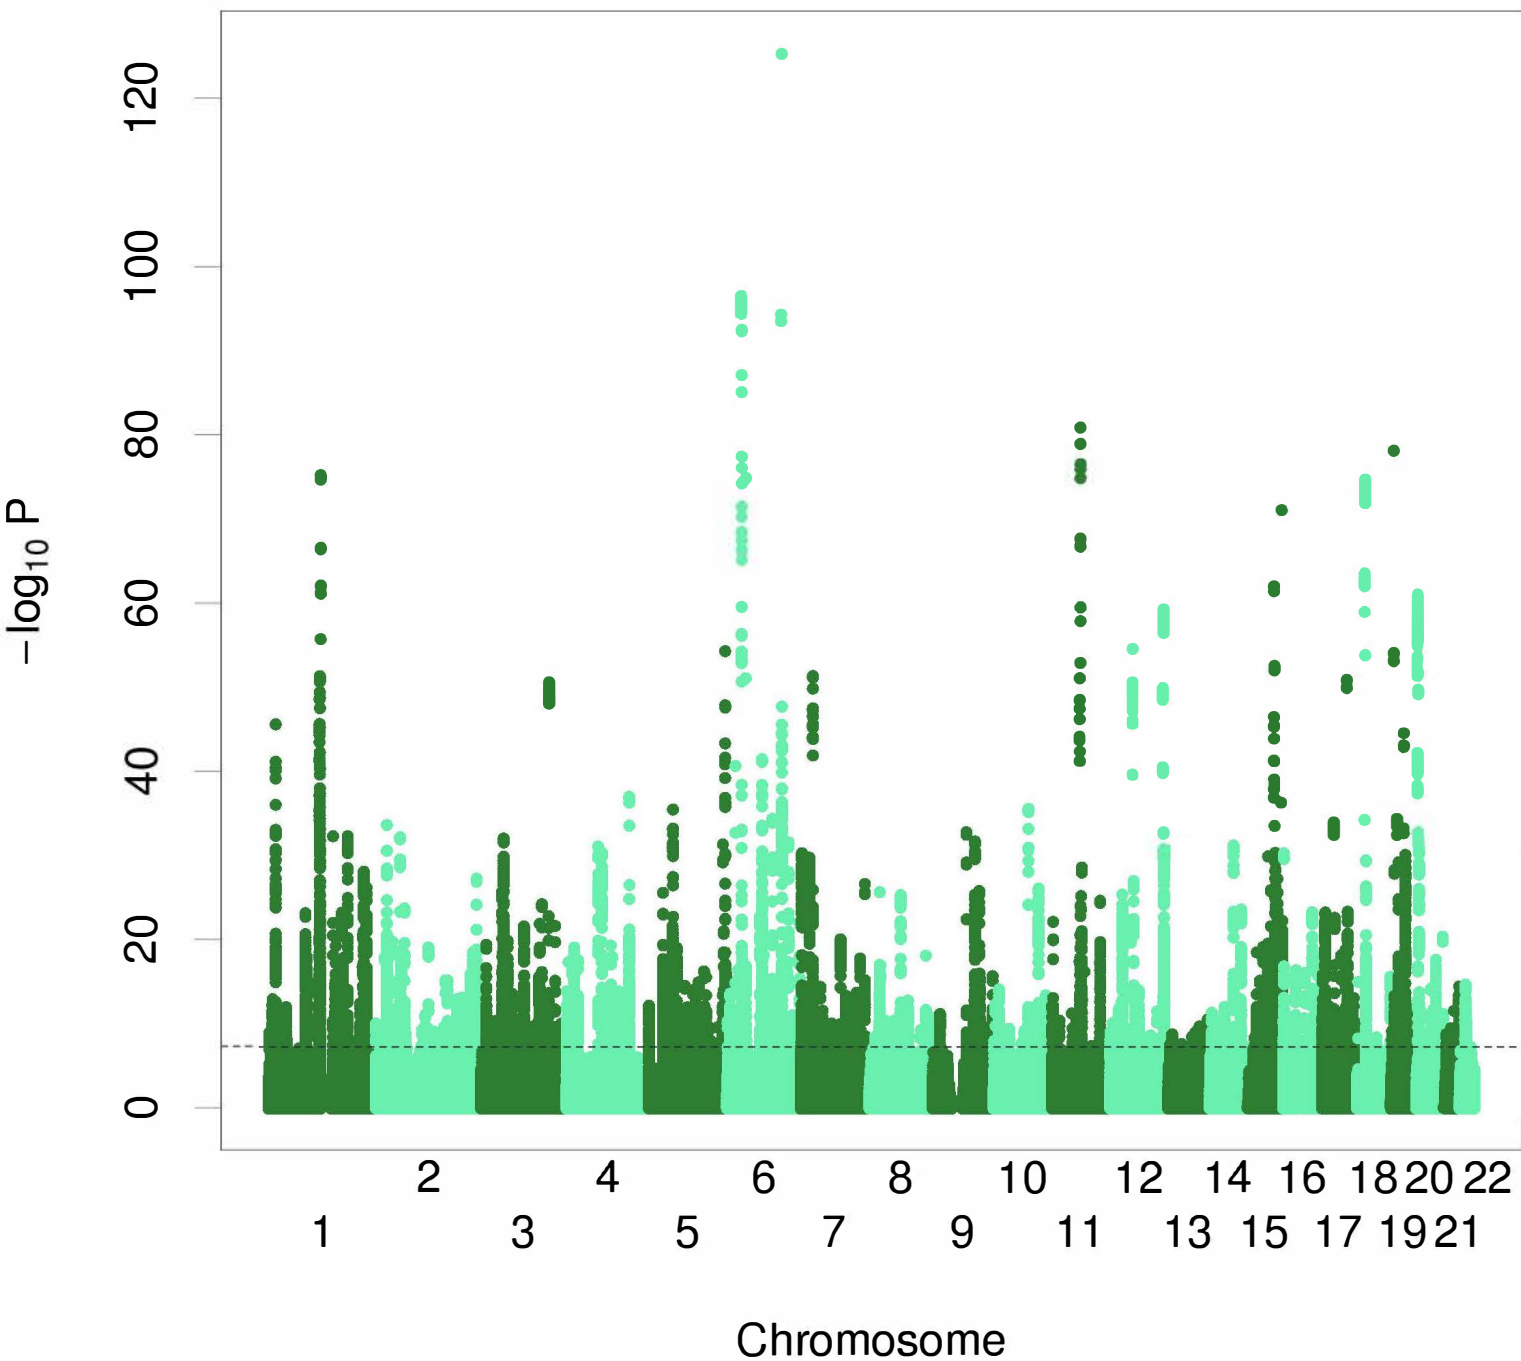

Supplement: NIHMS1545367-supplement-7.pdf [file NIHMS1545367-supplement-7.pdf]
